# Supplementary material for: Total synthesis of monosporascone and dihydromonosporascone
Source: Royal Society of Chemistry journal article supplement (doi:10.1039/c4ob00331d), 2014-01-01

## SUPPORTING INFORMATION

FOR

### Total synthesis of monosporascone and dihydromonosporascone

Kathryn A. Punch and Matthew J. Piggott\*

*School of Chemistry & Biochemistry, The University of Western Australia, Perth, Australia.*

[matthew.piggott@uwa.edu.au](mailto:matthew.piggott@uwa.edu.au)

#### CONTENTS: NMR spectra

|                                                                                                                        |    |
|------------------------------------------------------------------------------------------------------------------------|----|
| 3-(2,4-Dimethoxybenzoyl)furan ( <b>16</b> ) .....                                                                      | 2  |
| Methyl 4-[(3,5-dimethoxyphenyl)(hydroxy)methyl]-3-furoate ( <b>26</b> ) .....                                          | 4  |
| Ethyl 4-(3,5-dimethoxyphenyl)-4-hydroxybut-2-ynoate ( <b>29</b> ) .....                                                | 6  |
| Ethyl 4-((3,5-dimethoxyphenyl)(hydroxy)methyl)-3-furoate ( <b>31</b> ) .....                                           | 8  |
| Ethyl 4-(3,5-dimethoxybenzyl)-3-furoate ( <b>32</b> ) .....                                                            | 10 |
| 4-(3,5-Dimethoxybenzyl)-3-furoic acid ( <b>33</b> ) .....                                                              | 12 |
| 4-(3,5-Dimethoxybenzyl)furan-3-carbonyl chloride ( <b>34</b> ) .....                                                   | 14 |
| 8-Chloro-5,7-dimethoxynaphtho[2,3- <i>c</i> ]furan-4(9 <i>H</i> )-one ( <b>36</b> ) .....                              | 16 |
| Methyl 4-(3,5-dimethoxybenzoyl)-3-furoate ( <b>37</b> ) .....                                                          | 18 |
| 4-(3,5-Dimethoxybenzoyl)-3-furoic acid ( <b>38</b> ) .....                                                             | 20 |
| Furo[3,4- <i>c</i> ]furan-1,3-dione ( <b>41</b> ) .....                                                                | 22 |
| 4-(Benzyl(methyl)carbamoyl)-3-furoic acid ( <b>42</b> ) .....                                                          | 24 |
| ( <i>Z</i> )-Ethyl 4-(3,5-dimethoxyphenyl)-4-oxobut-2-enoate ( <b>44</b> ) .....                                       | 25 |
| Ethyl 4-(3,5-dimethoxyphenyl)-4-oxobut-2-ynoate ( <b>43</b> ) .....                                                    | 27 |
| Ethyl 4-(3,5-dimethoxybenzoyl)-3-furoate ( <b>49</b> ) .....                                                           | 29 |
| 4-(3,5-Dimethoxybenzoyl)furan-3-carbonyl chloride ( <b>51</b> ) .....                                                  | 31 |
| 5-Hydroxy-7-methoxynaphtho[2,3- <i>c</i> ]furan-4,9-dione, ( <i>monosporascone</i> ) ( <b>4</b> ) .....                | 33 |
| 5-Hydroxy-7-methoxy-1,3-dihydronaphtho[2,3- <i>c</i> ]furan-4,9-dione ( <i>dihydromonosporascone</i> ) ( <b>5</b> ) .. | 35 |

300 MHz <sup>1</sup>H NMR spectrum in CDCl<sub>3</sub>

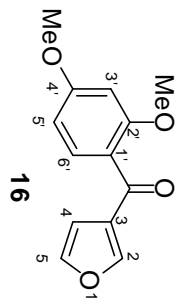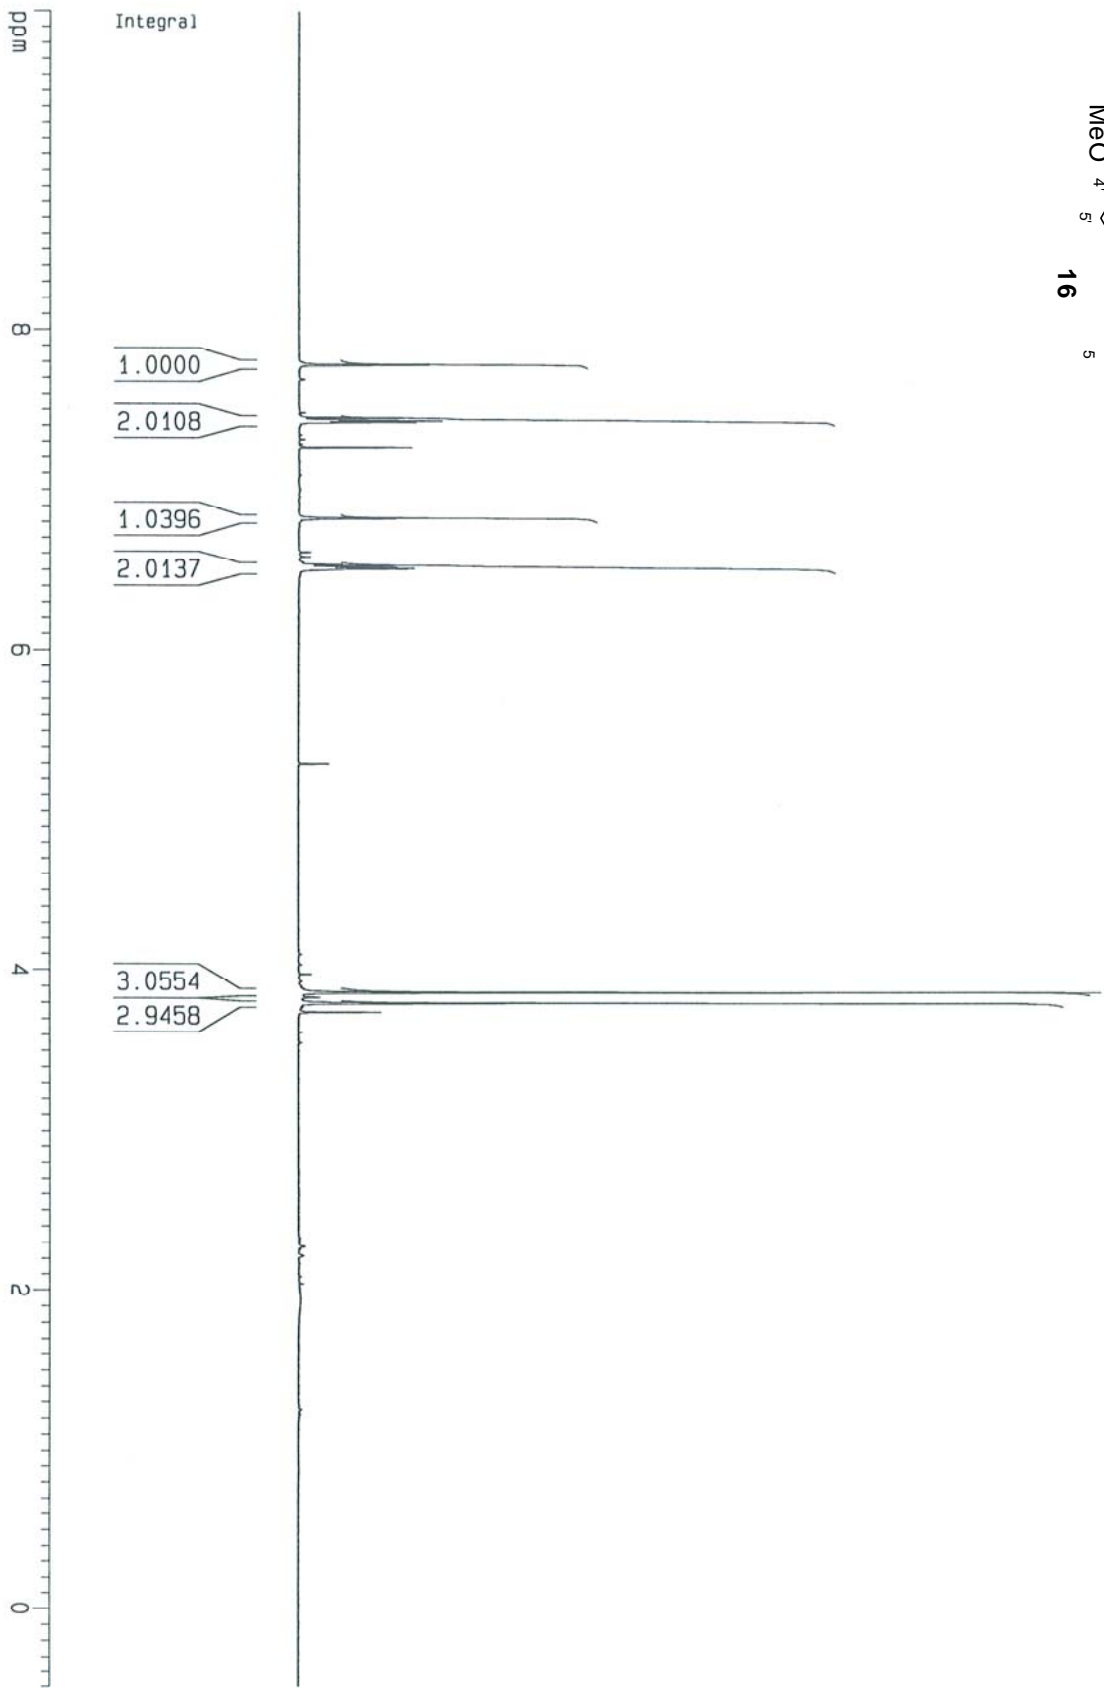

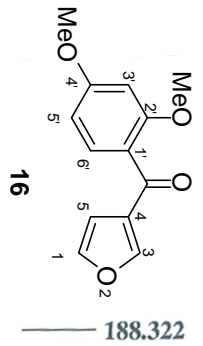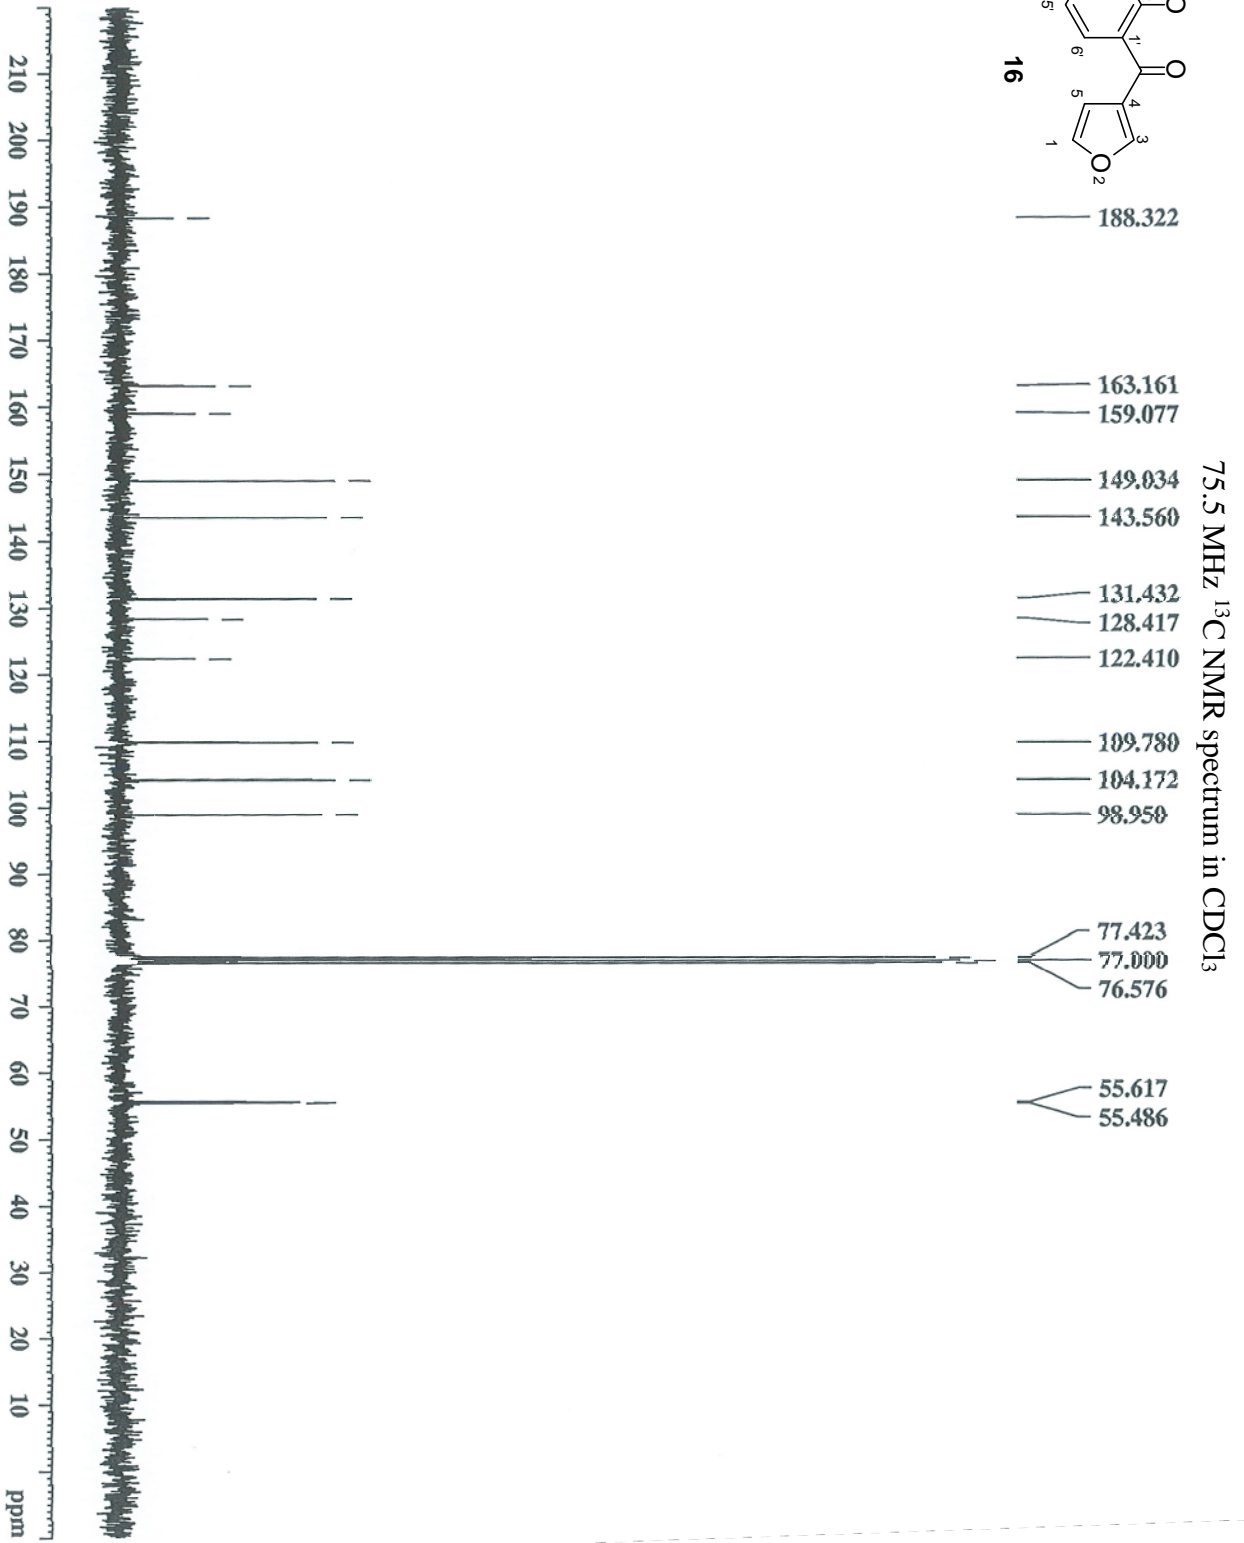

300 MHz <sup>1</sup>H NMR spectrum in CDCl<sub>3</sub>

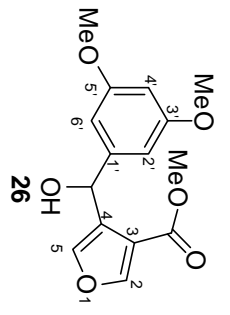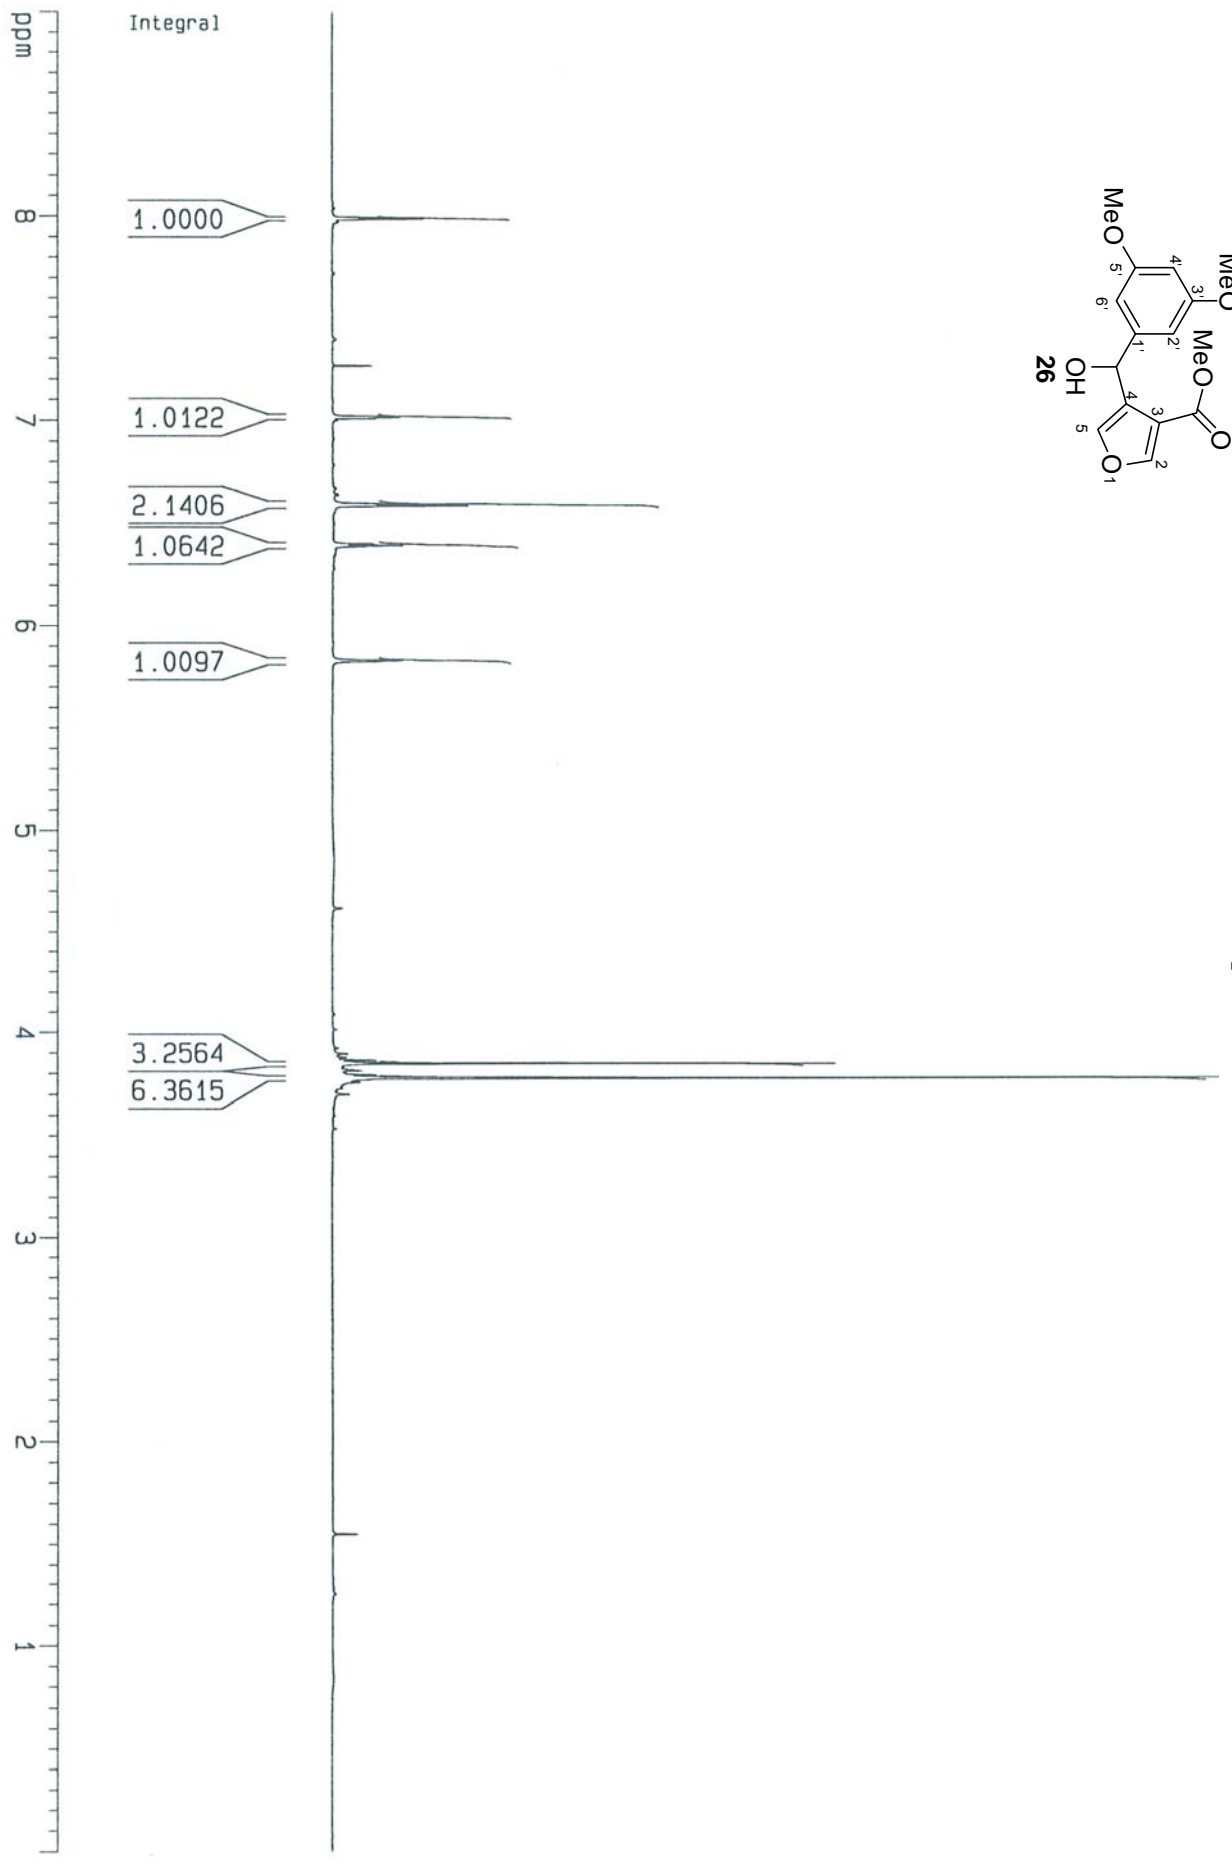

75.5 MHz  $^{13}\text{C}$  NMR spectrum in  $\text{CDCl}_3$

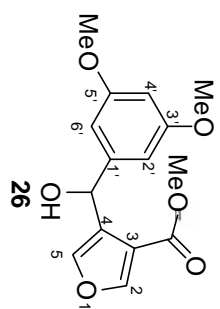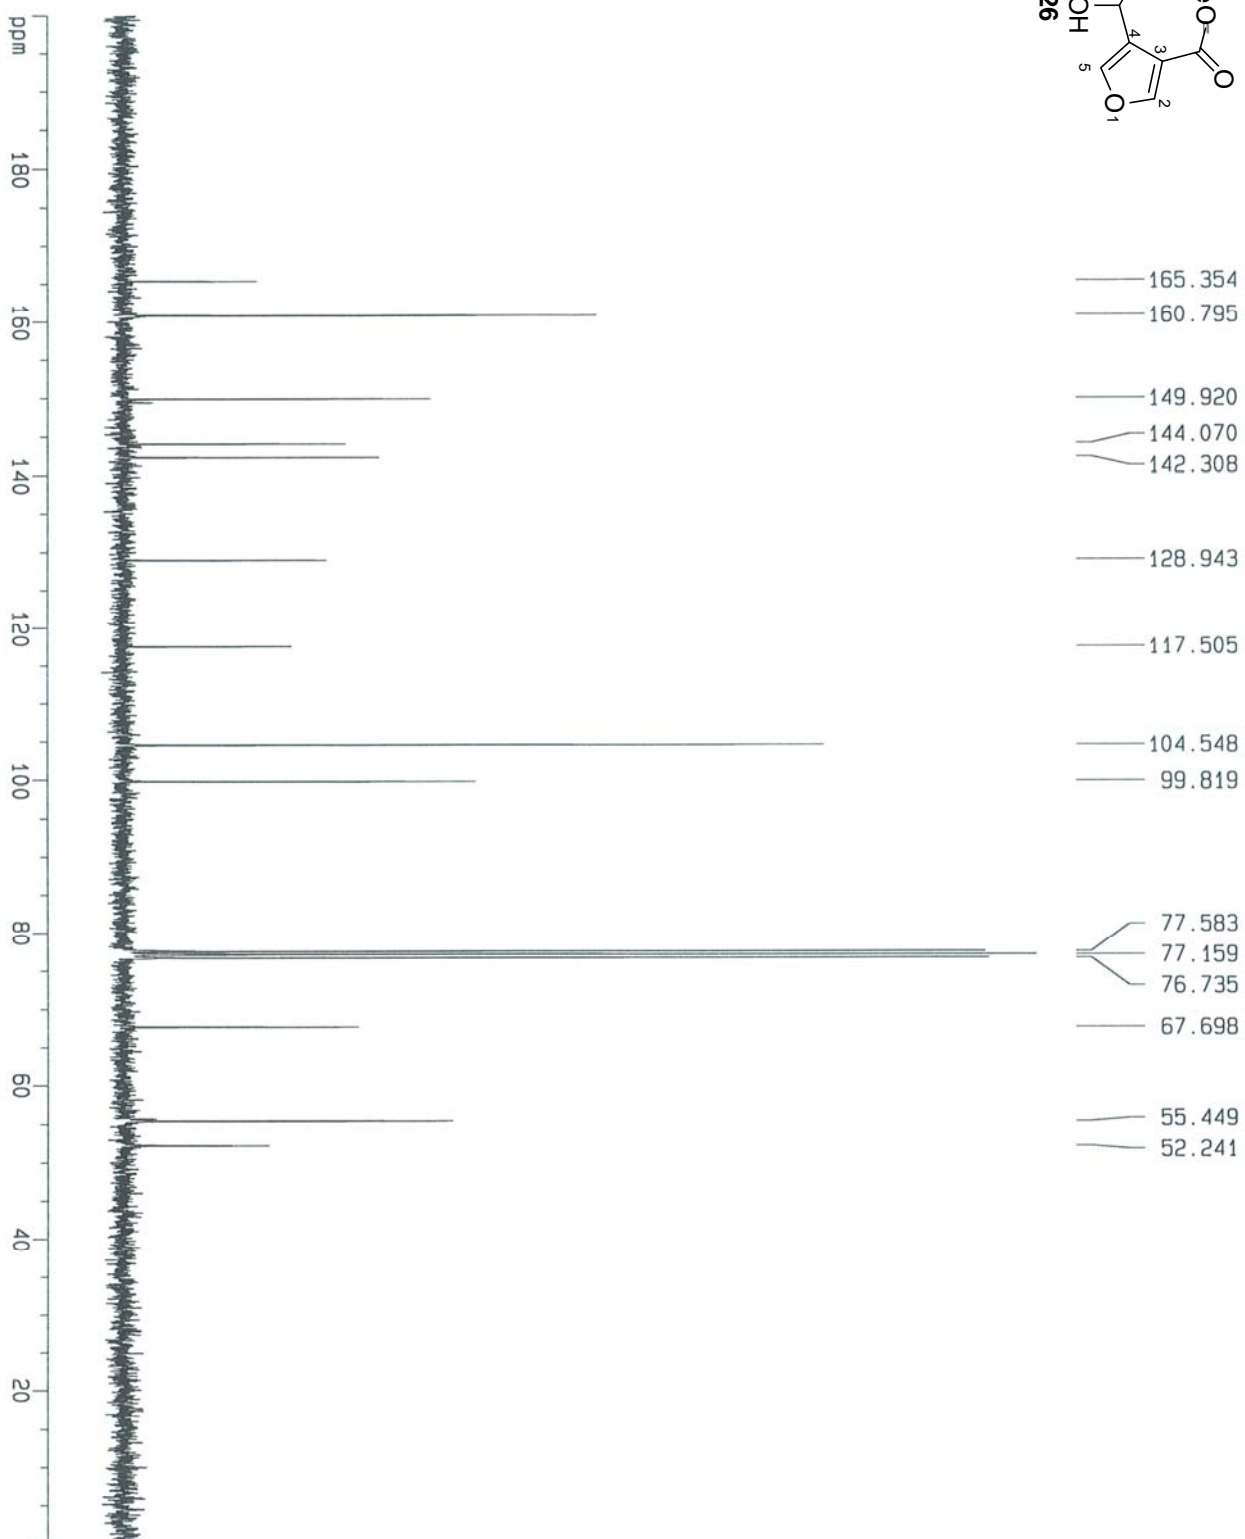

Automation directory: /home/piggott/nmr/sys/data/au  
File : kap03-006-030 /data/mg-Prot\_01.f1d  
Sample : kap03-006-0301  
Sample : kap03-006-03  
Pulse Sequence: s2pu1

400 MHz <sup>1</sup>H NMR spectrum in CDCl<sub>3</sub>

2 x OMe

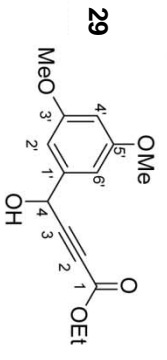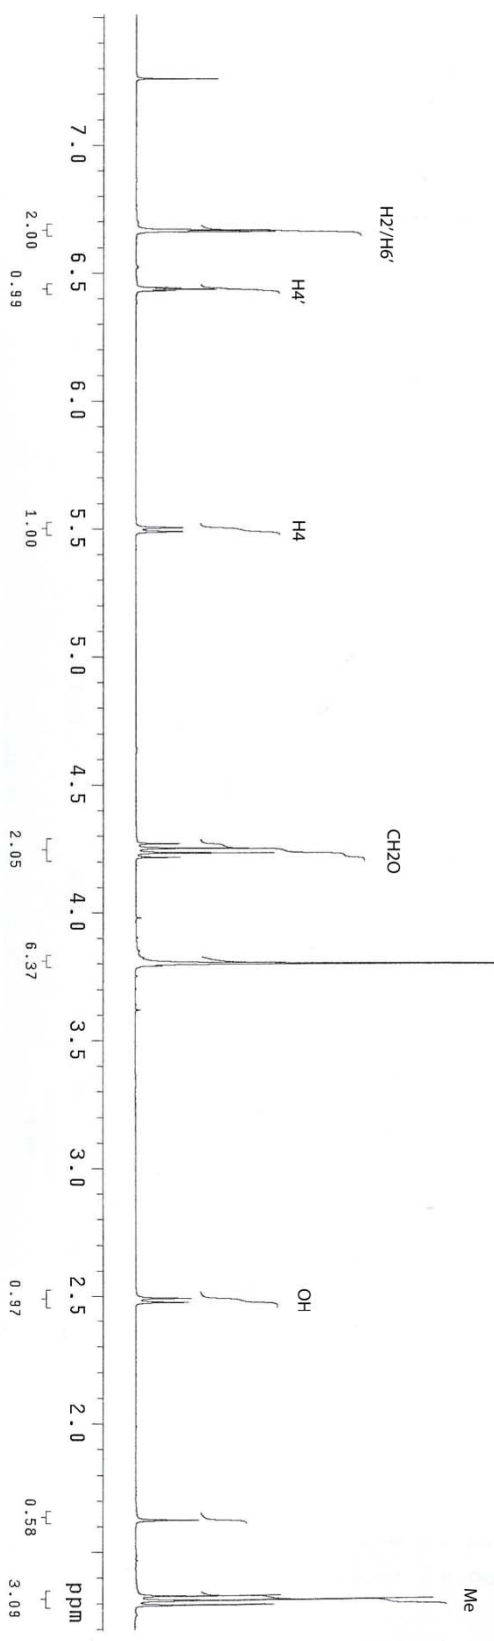

# 100 MHz <sup>13</sup>C NMR spectrum in CDCl<sub>3</sub>

Automation directory: /home/pigott/vnmrsys/data/auto\_2007.11.18\_03  
 File : exp  
 Sample id : tmpstudy  
 Sample : kap03-006-03  
 Pulse Sequence: s2put  
 Solvent: cdcl3  
 Temp: 25.0 C / 298.1 K  
 Operator: pigott  
 VNMRS-400 "Var400"  
 Relax: delay 1.000 sec  
 Pulse 45.0 degrees  
 Acq: time 1.300 sec  
 Width 24509.8 Hz  
 192 repetitions  
 OBSERVE G13, 100.5492942 MHz  
 OBSERVE H1, 399.5975250 MHz  
 Power 43 dB  
 continuously on  
 WALTZ-16 modulated  
 DATA PROCESSING  
 Line broadening 0.5 Hz  
 FT size 65536  
 Total time 38 min, 29 sec

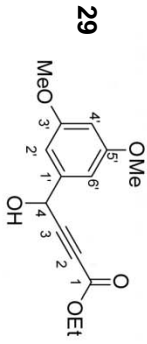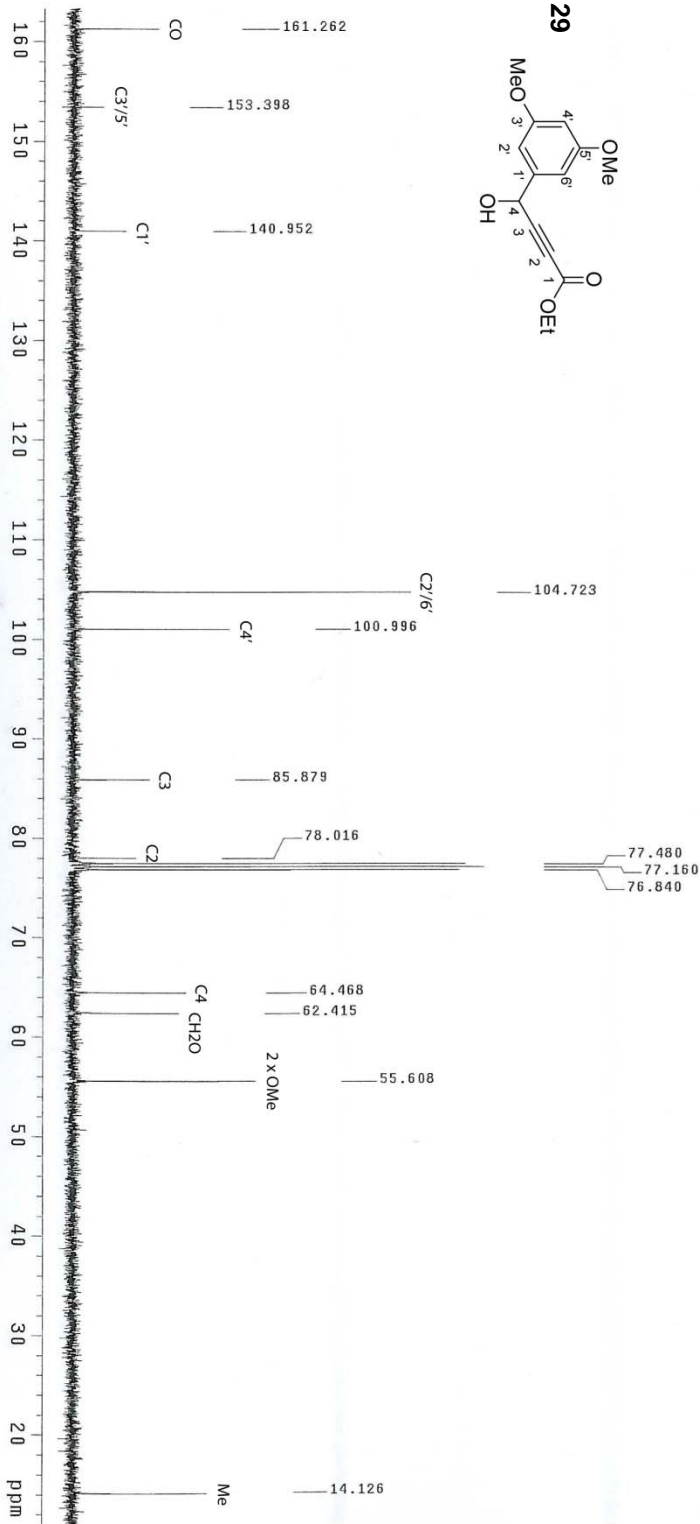

400 MHz <sup>1</sup>H NMR spectrum in CDCl<sub>3</sub>

2 x OMe

Automation directory: /home/piiggott/vnmrSYS/data/aut0\_2007.11.12.03  
 File: /home/piiggott/piiggott/piiggott\_nmr\_data/kap/kap05-020-03.f1d  
 Sample id: kap05-020-03  
 Sample: kap05-020-03  
 Pulse Sequence: s2pu1  
 Solvent: cdcl3  
 Temperature: 298.1 K  
 Operator: piiggott  
 File: kap05-020-03  
 VNMRS-400 "Var-400"  
 Relax, delay 5.000 sec  
 Pulse 45.0 degrees  
 Acq. time 4.992 sec  
 Width 6410.3 Hz  
 16 repetitions  
 OBSERVE H1, 399.8555161 MHz  
 DATA PROCESSING  
 Line broadening 0.5 Hz  
 FT size 131072  
 Total time 3 min, 0 sec

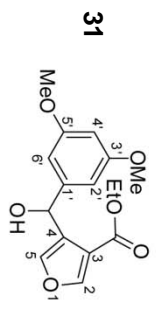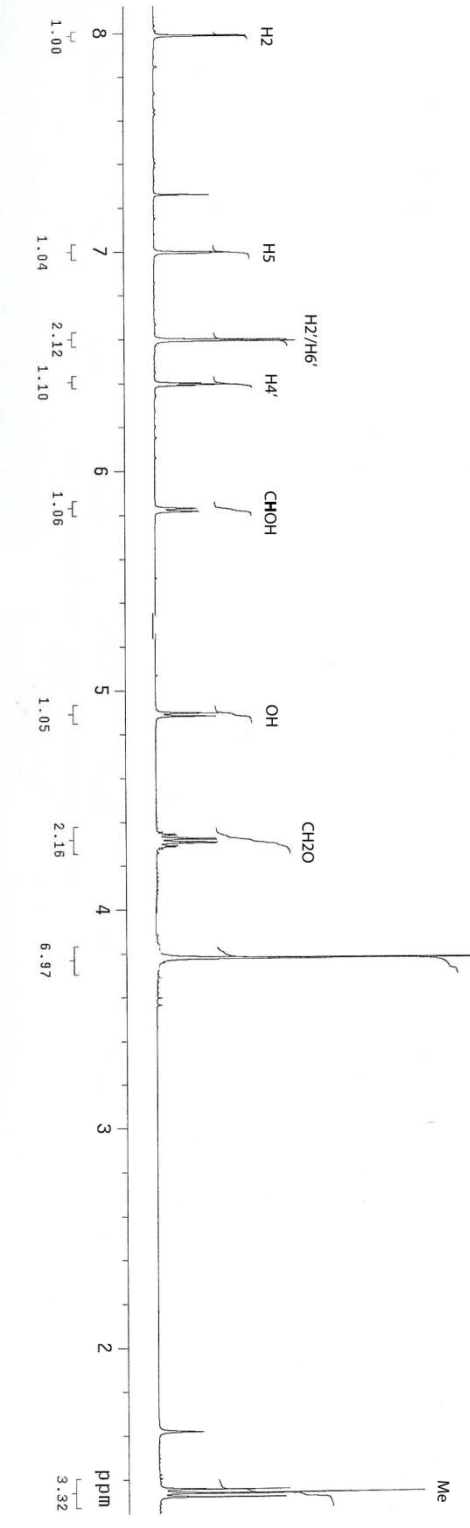



100 MHz <sup>13</sup>C NMR spectrum in CDCl<sub>3</sub>

Automation directory: /home/pijgott/vnmrSYS/data/auto\_2007.11.12\_03  
 File : exn  
 Sample id : tmpstudy  
 Sample : kap03-020-03  
 Pulse Sequence: s2pul1  
 Solvent: cdcl3  
 Temp: 25.0 C / 298.1 K  
 Operator: pijgott  
 VNMRS-400 "var400"  
 Relax: delay 1.000 sec  
 Pulse 45.0 degrees  
 Acq: time 1.300 sec  
 Width 24509.8 Hz  
 112 repetitions  
 OBSERVE CH3, 100.5497350 MHz  
 DECPROG zgpg30, 399.6575230 MHz  
 Power 43 dB, continuously on  
 WALTZ-16 modulated

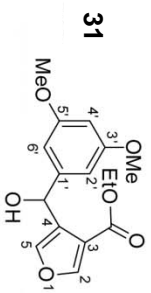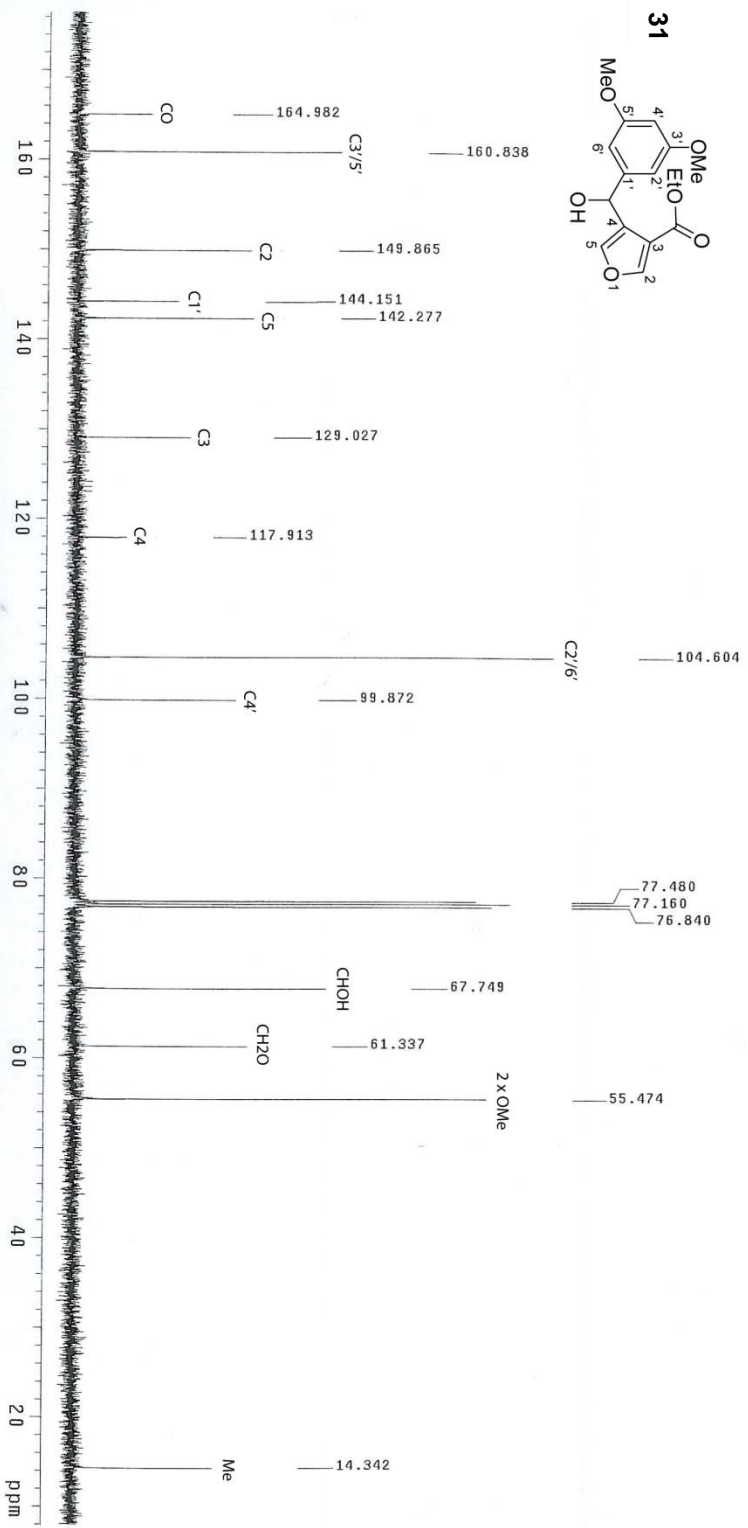

400 MHz <sup>1</sup>H NMR spectrum in CDCl<sub>3</sub>

Automation directory: /home/pi/gott/vnmr/sy/data/auto\_2007.11.14  
 File : kap03-028-028 /data/mg-Prot\_01.tid  
 Sample : kap03-028-028  
 Sample : kap03-028-02  
 Pulse Sequence: szpu1  
 Solvent: cdcl3  
 Temp: 25.0 C / 298.1 K  
 Operator: pi/gott  
 File: mg-Prot\_01  
 VMRSS-400 "var400"  
 Relax: delay 5.000 sec  
 Pulse 45.0 degrees  
 Acq. time 4.992 sec  
 Width 6410.3 Hz  
 16 repetitions  
 OBSERVE H1, 399.8555162 MHz  
 DATA PROCESSING  
 Time Broadening 0.5 Hz  
 Fz 233172  
 Total time 3 min, 0 sec

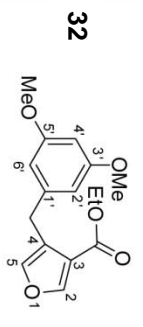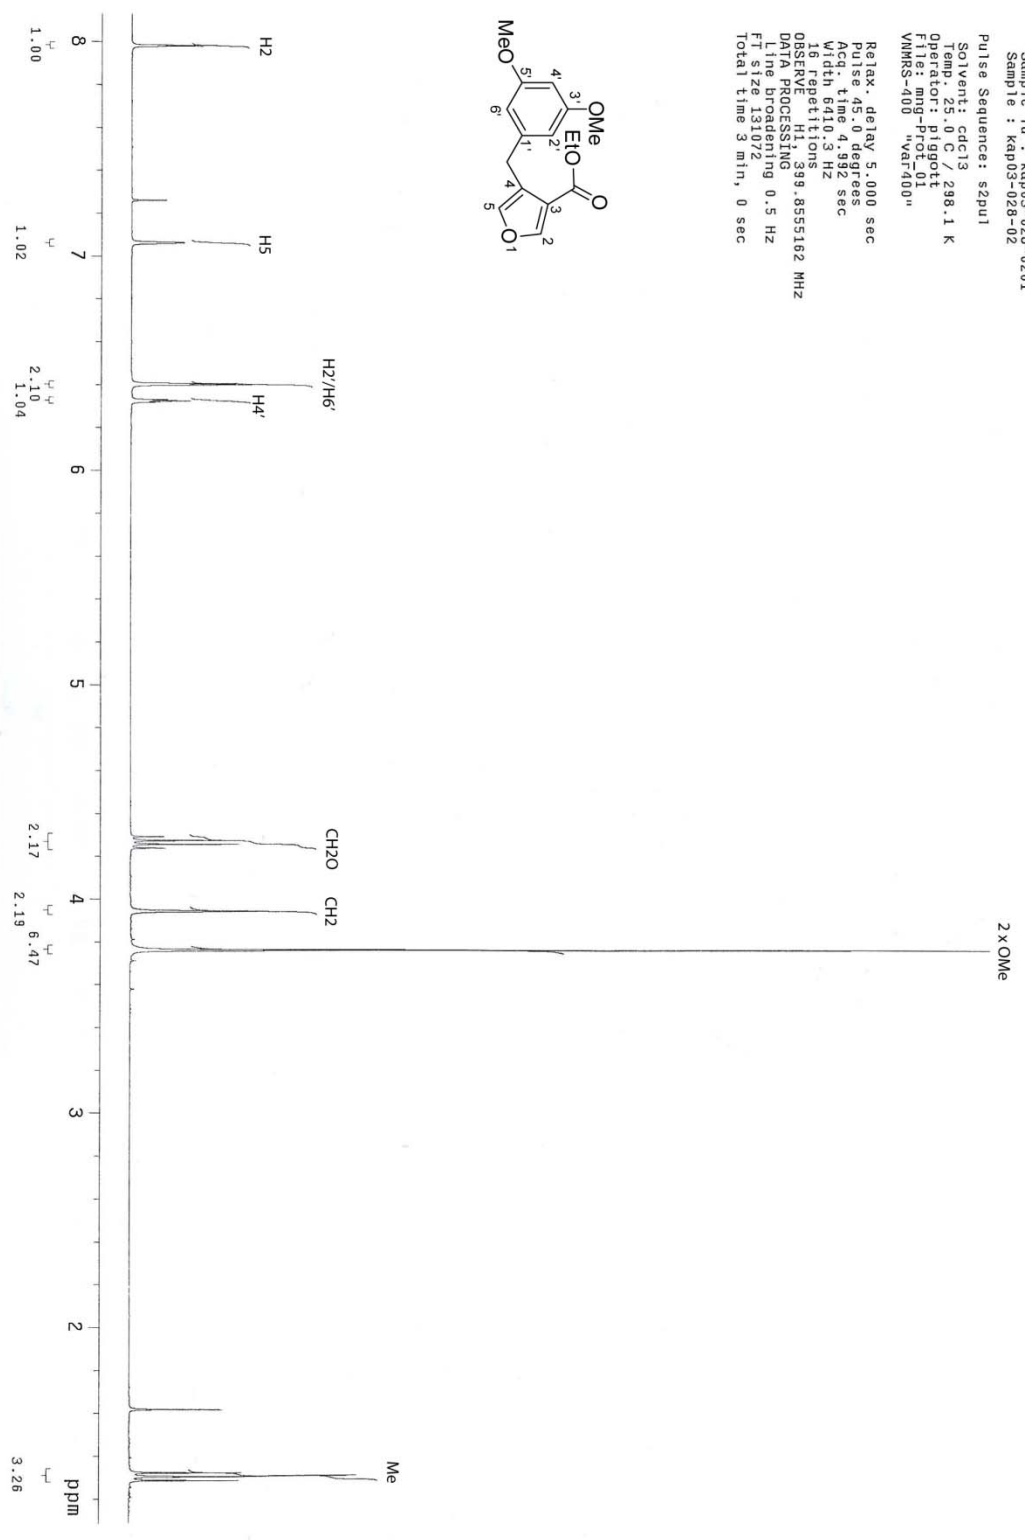

100 MHz <sup>13</sup>C NMR spectrum in CDCl<sub>3</sub>

Automation directory: /home/pi/gott/vnmr/sys/data/auto\_2007.11.14\_01

File : exp  
 Sample id : tmpstudy  
 Sample : Kap03-028-02

Pulse Sequence: s2pu1

Solvent: cdcl3  
 Temp: 25.0 C / 298.1 K  
 Operator: pi/gott  
 VMRK-400 "Var400"

Relax. delay 1.000 sec  
 Pulse 45.0 degrees  
 Acq. time 1.300 sec  
 Width 24509.8 Hz  
 258 repetitions  
 OBSERVE C13, 100.5437350 MHz  
 DECUPLE H1, 399.8575230 MHz  
 Power 43 db  
 Continuity on  
 WALTZ-16 modulated

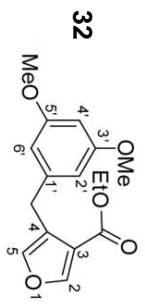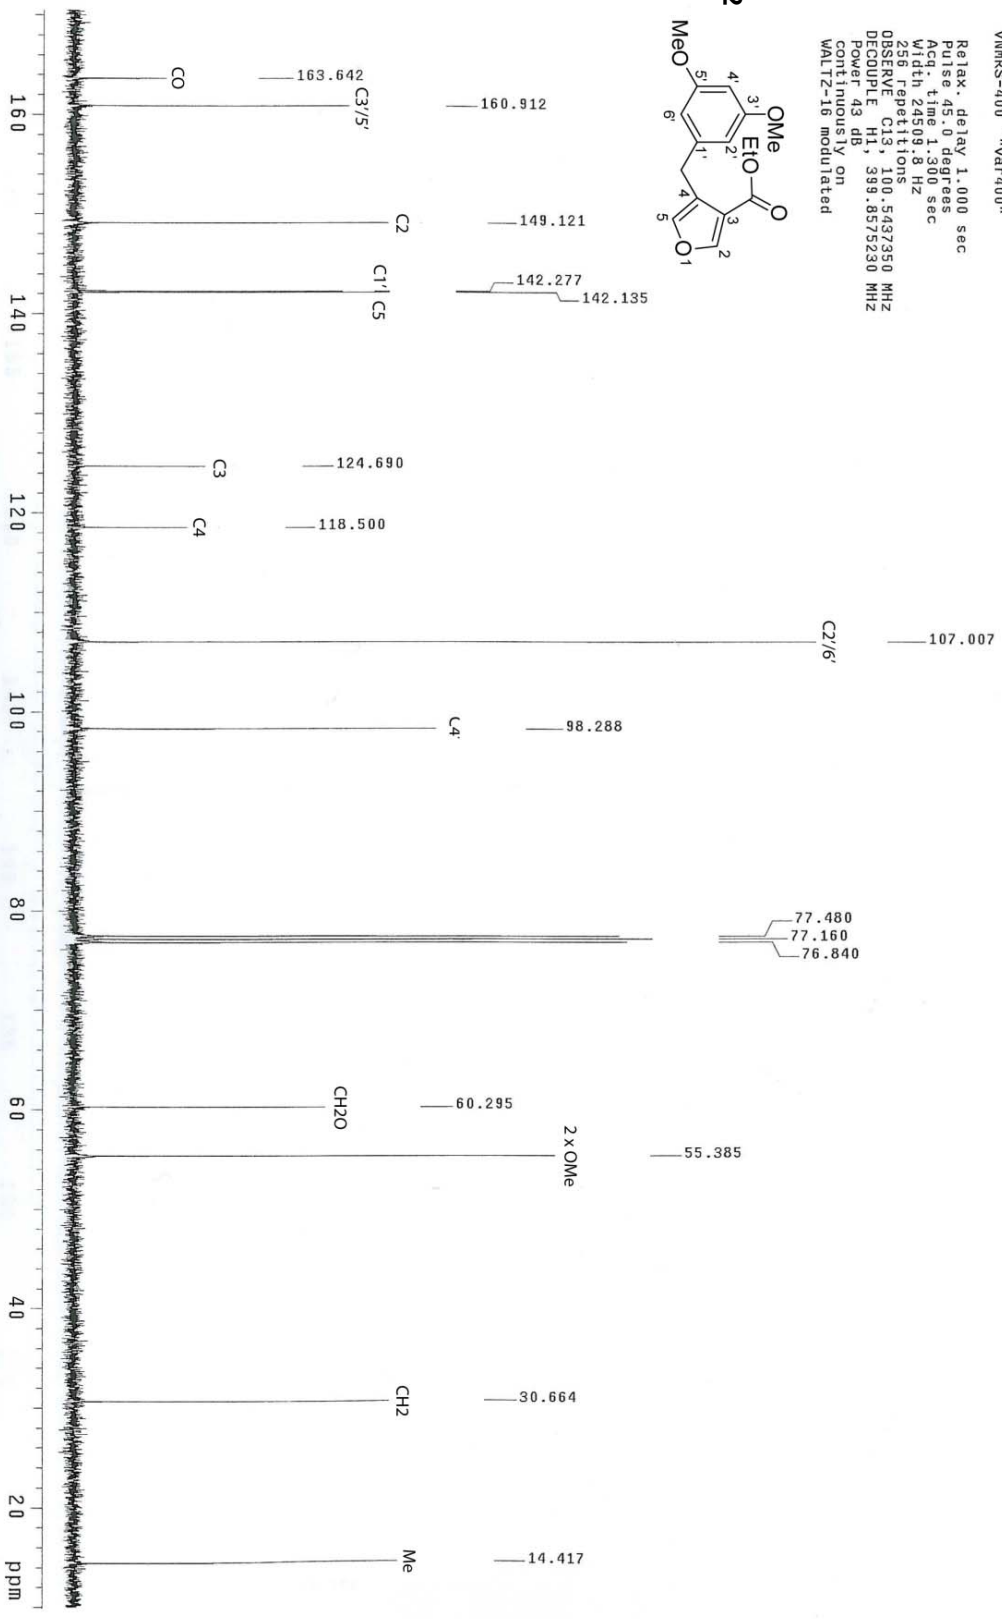

400 MHz <sup>1</sup>H NMR spectrum in CDCl<sub>3</sub>

Automation directory: /home/piggott/vnmr/svs/data/auto\_2007.11.20\_05  
 File : kap03-038-0201/data/mng-Prot\_01.fid  
 Sample id : kap03-038-0201  
 Sample : kap03-038-02

Pulse Sequence: s2pul

Solvent: cdcl3  
 Temp: 25.0 C / 298.1 K  
 Operator: piggott  
 File: mng-Prot\_01  
 VNMR-400 "var400"

Relax . delay 5.000 sec  
 Pulse 45.0 degrees  
 Acq. time 4.992 sec  
 Width 6410.3 Hz  
 16 repetitions  
 OBSERVE H1, 399.8555162 MHz  
 DATA PROCESSING  
 Line broadening 0.5 Hz  
 FT size 131072  
 Total time 3 min, 0 sec

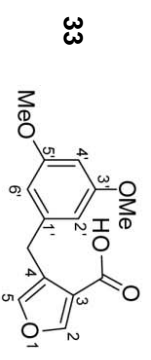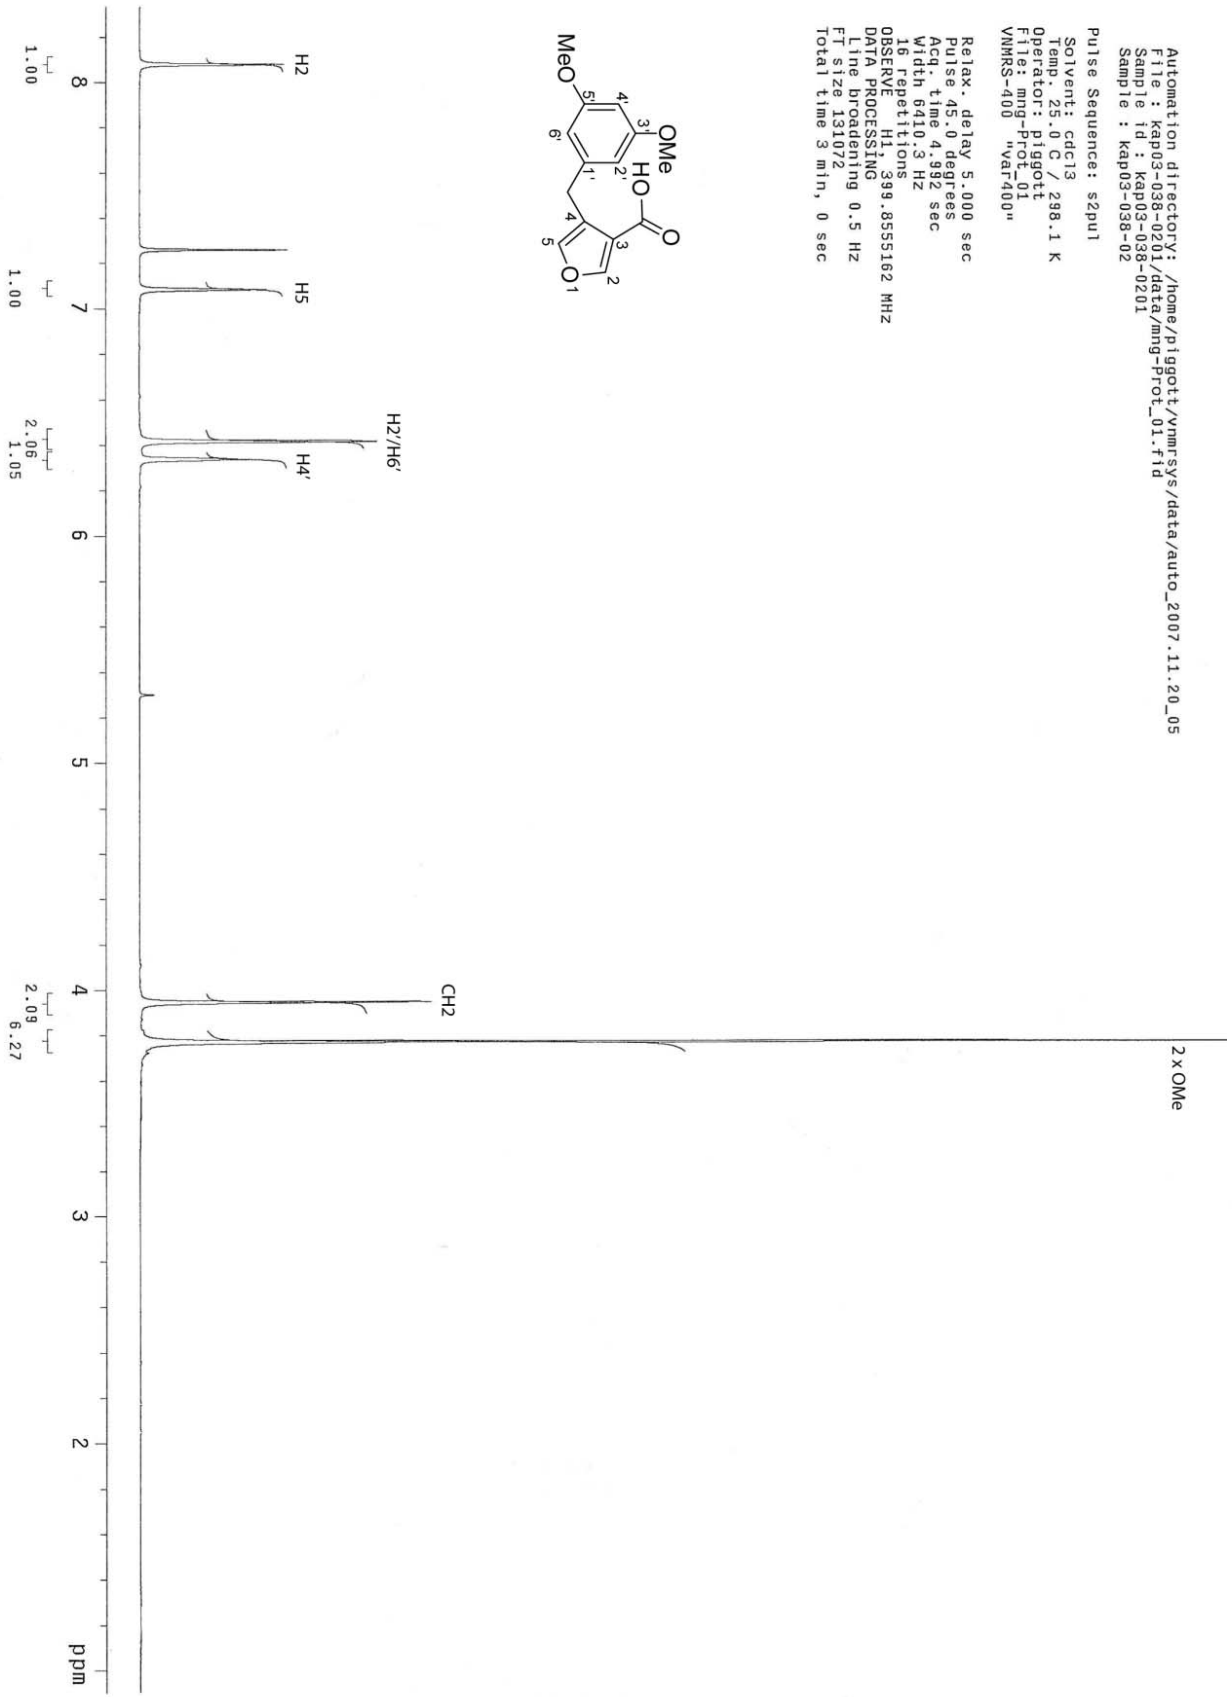

100 MHz <sup>13</sup>C NMR spectrum in CDCl<sub>3</sub>

Automation directory: /home/pigott/vnmrSYS/data/auto\_2007.11.20\_05  
 Exp: 10  
 Sample id: tmpstudy  
 Sample : kap03-038-02  
 Pulse Sequence: szpu1  
 Solvent: cdcl3  
 Temp: 25.0 C / 298.1 K  
 Operator: pigott  
 VNMRS-400 "var400"  
 Relax. delay 1.000 sec  
 Pulse 45.0 degrees  
 Acq. time 1.300 sec  
 Width 24509.8 Hz  
 448 Repetitions  
 OBSERVE C13, 100.5437935 MHz  
 DECOUPLE H1, 399.8575230 MHz  
 Power 43 db  
 WALTZ16 only on  
 WALTZ16 11000000  
 DATA PROCESSING  
 Line broadening 0.5 Hz  
 FT size 65536  
 Total time 38 min, 29 sec

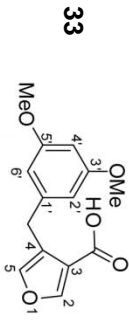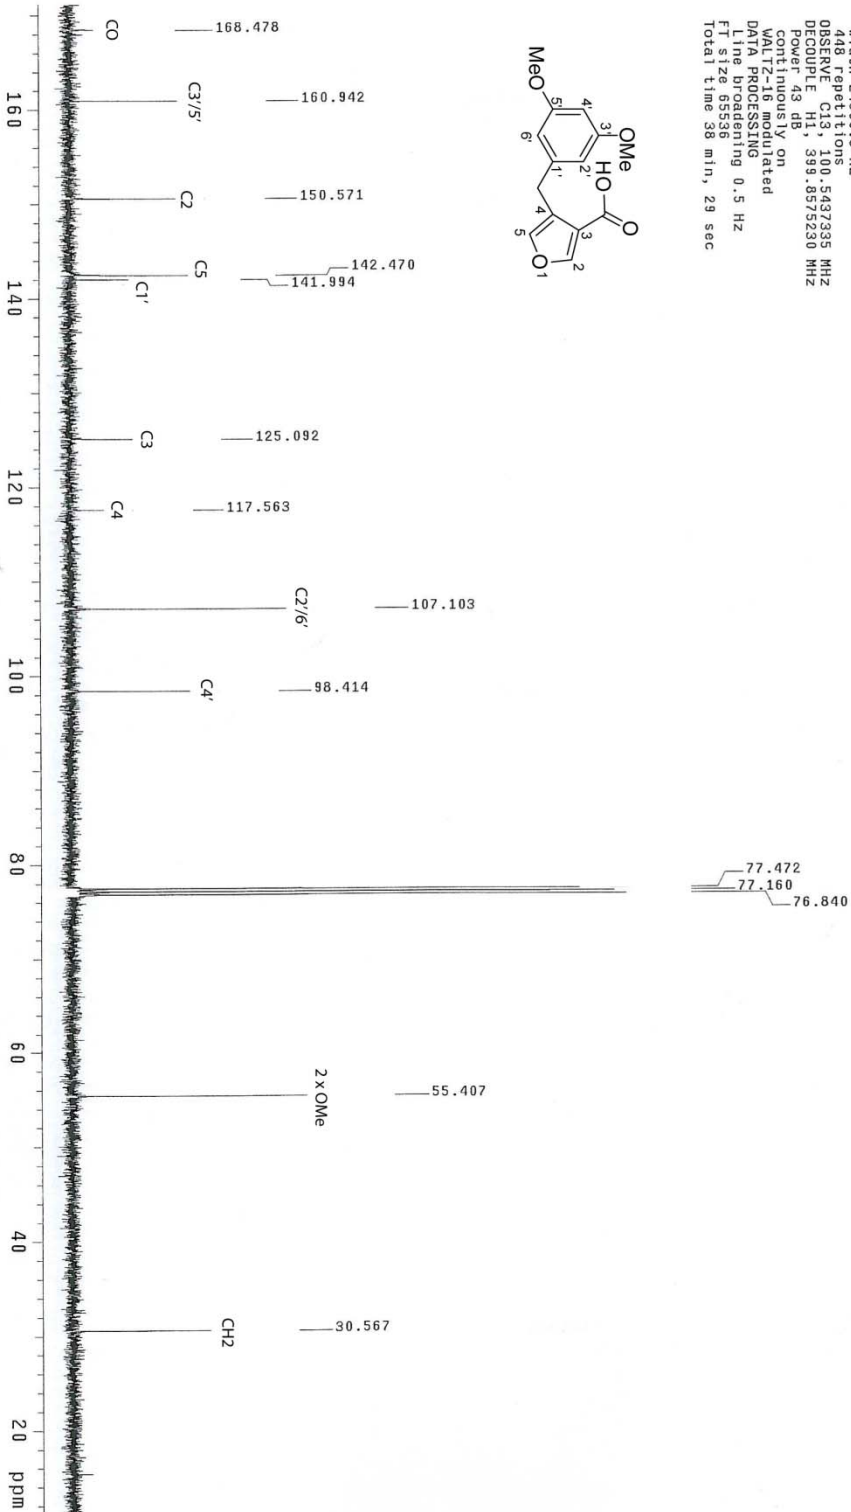

400 MHz <sup>1</sup>H NMR spectrum in CDCl<sub>3</sub>

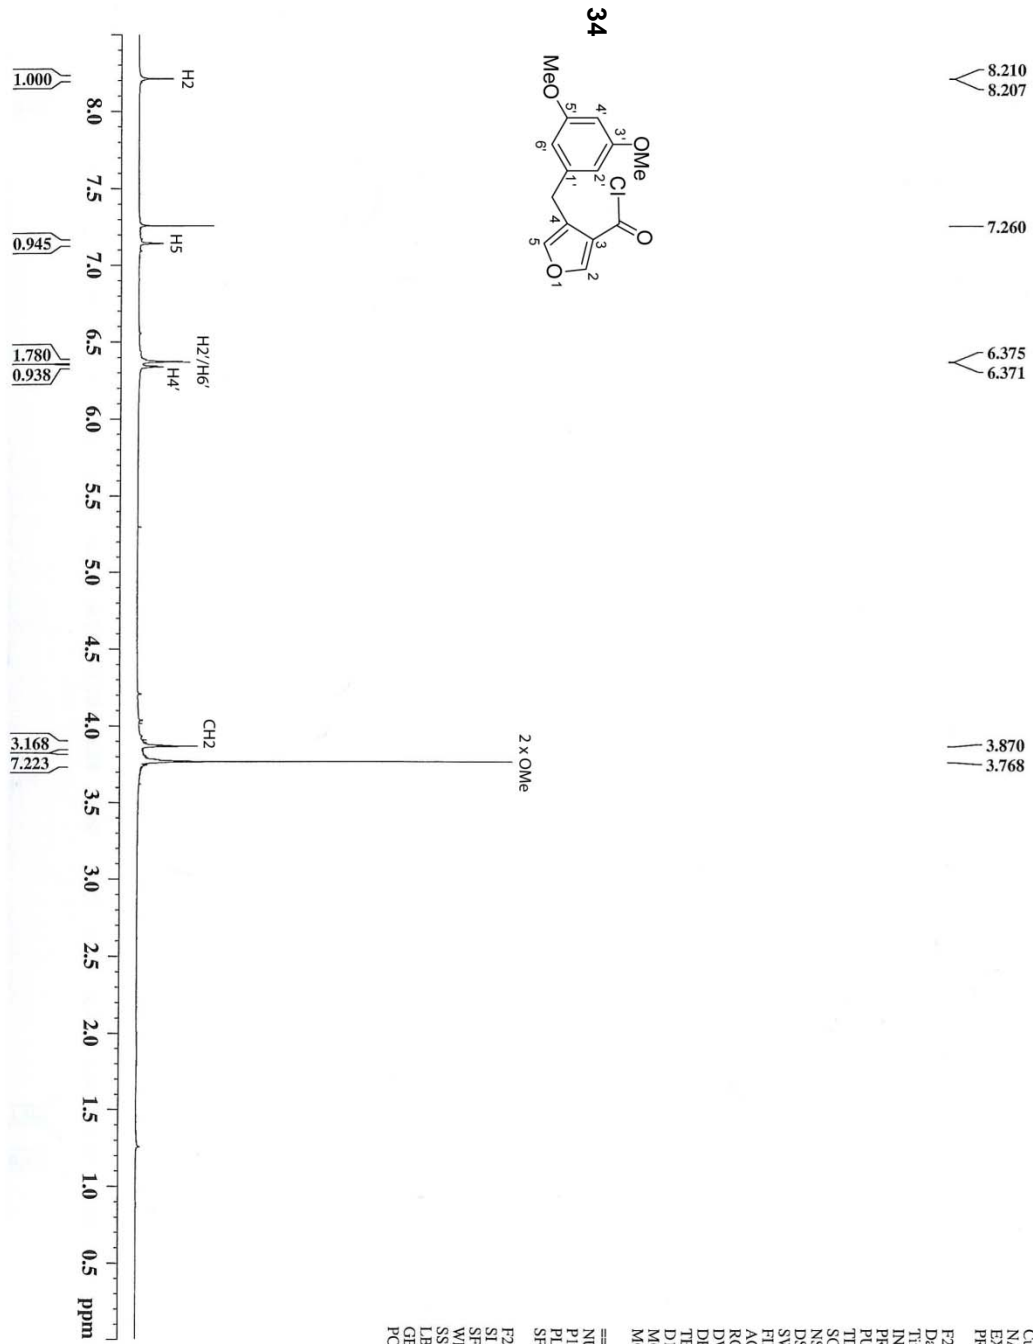

8.210  
8.207  
7.260  
6.375  
6.371  
3.870  
3.768

H2  
H5  
H2/H6'  
H4'  
CH2  
2 x OMe

1.000  
0.945  
1.780  
0.938  
3.168  
7.223

8.0  
7.5  
7.0  
6.5  
6.0  
5.5  
5.0  
4.5  
4.0  
3.5  
3.0  
2.5  
2.0  
1.5  
1.0  
0.5  
ppm

Current Data Parameters  
 NAME kap05-044-02  
 EXPNO 2  
 PROCNO 1

F2 - Acquisition Parameters  
 Date\_ 20100715  
 Time 13:32  
 INSTRUM spect  
 PROBHD 5 mm Dual 13C/  
 PULPROG zg30  
 TD 65536  
 SOLVENT CDCl3  
 NS 8  
 DS 4  
 SWH 7507.507 Hz  
 FIDRES 0.114555 Hz  
 AQ 4.3648143 sec  
 RG 574.7  
 DW 66.600 usec  
 DE 7.50 usec  
 TE 298.0 K  
 D1 5.00000000 sec  
 MCREST 0.00000000 sec  
 MCVW 0.01500000 sec

==== CHANNEL f1 =====  
 NUC1 1H  
 P1 12.70 usec  
 PL1 -1.00 dB  
 SFO1 500.1327500 MHz

F2 - Processing parameters  
 SI 65536  
 SF 500.1300227 MHz  
 WDW no  
 SSB 0  
 LB 0.00 Hz  
 GB 0  
 PC 1.00

100 MHz <sup>13</sup>C NMR spectrum in CDCl<sub>3</sub>

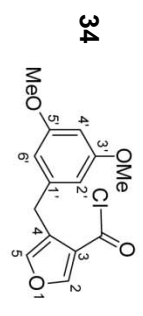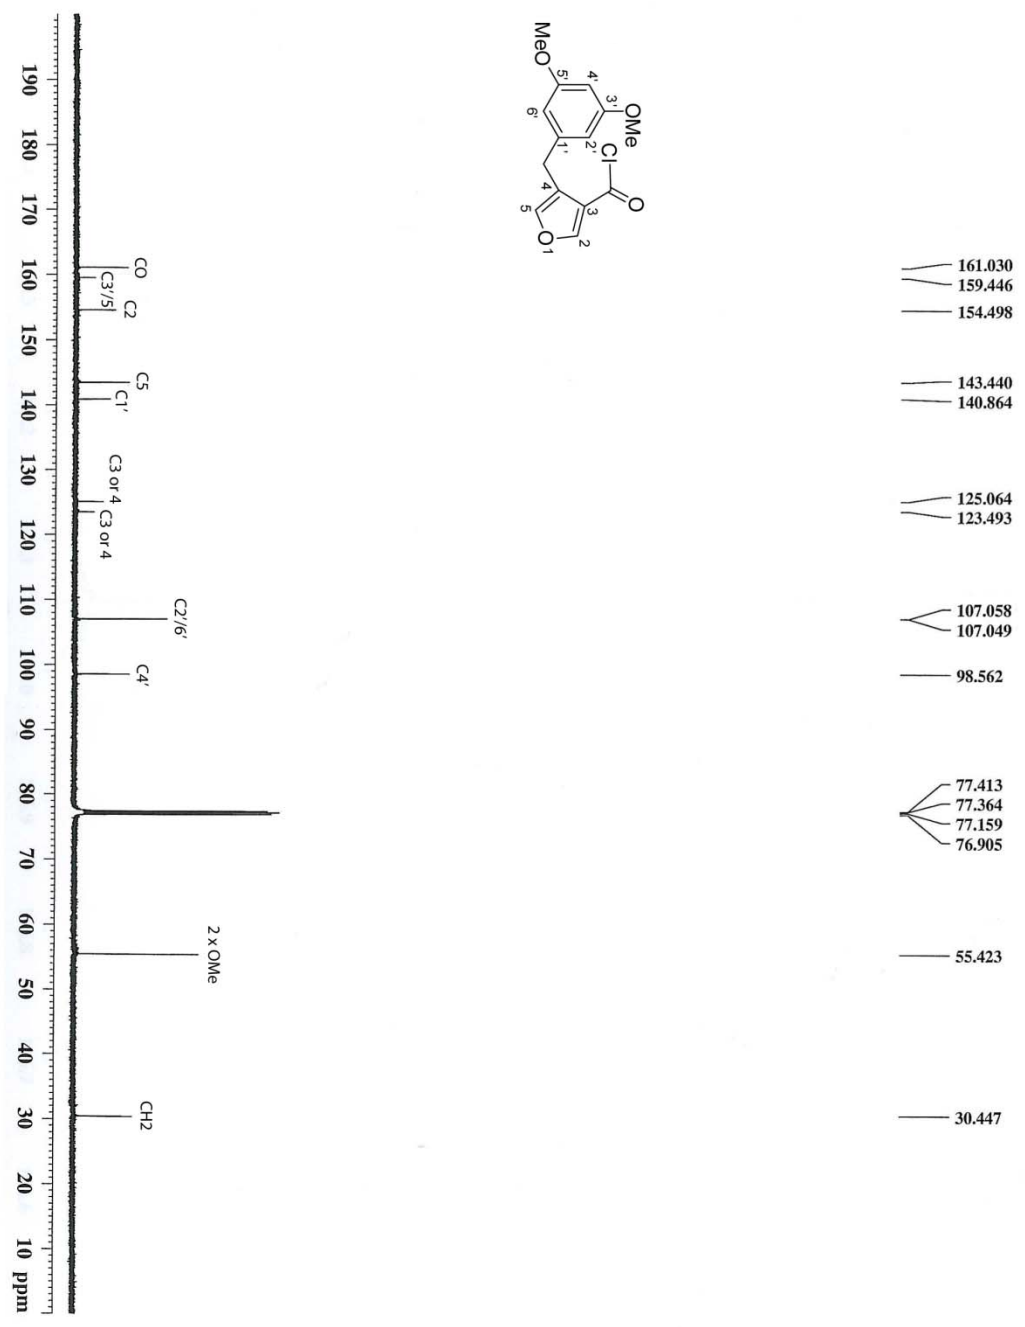

Current Data Parameters  
 NAME kap05-044-02  
 EXPNO 3  
 PROCNO 1

F2 - Acquisition Parameters  
 Date\_ 20100715  
 Time 14:00  
 INSTRUM spect  
 PROBHD 5 mm Dual 13C/  
 PULPROG zgpg30  
 TD 65536  
 SOLVENT CDCl3  
 NS 839  
 DS 4  
 SWH 31446.541 Hz  
 FDRRES 0.479836 Hz  
 AQ 1.0420883 sec  
 RG 20642.5  
 DW 15.900 usec  
 DE 20.00 usec  
 TE 298.0 K  
 D1 2.00000000 sec  
 d11 0.03000000 sec  
 DELTA 1.89999998 sec  
 MCREST 0.00000000 sec  
 MCGWIRK 0.01500000 sec

===== CHANNEL f1 =====  
 NUC1 13C  
 P1 14.00 usec  
 PL1 2.00 dB  
 SFO1 125.7709890 MHz

===== CHANNEL f2 =====  
 CPDPRG2 waltz16  
 NUC2 1H  
 RCPD2 100.00 usec  
 PL2 120.00 dB  
 PL12 16.00 dB  
 PL13 20.00 dB  
 SFO2 500.1322500 MHz

F2 - Processing parameters  
 SI 65536  
 SF 125.7577755 MHz  
 WDW no  
 SSB 0  
 LB 0.00 Hz  
 GB 0  
 PC 1.00

600 MHz <sup>1</sup>H NMR spectrum in CDCl<sub>3</sub>

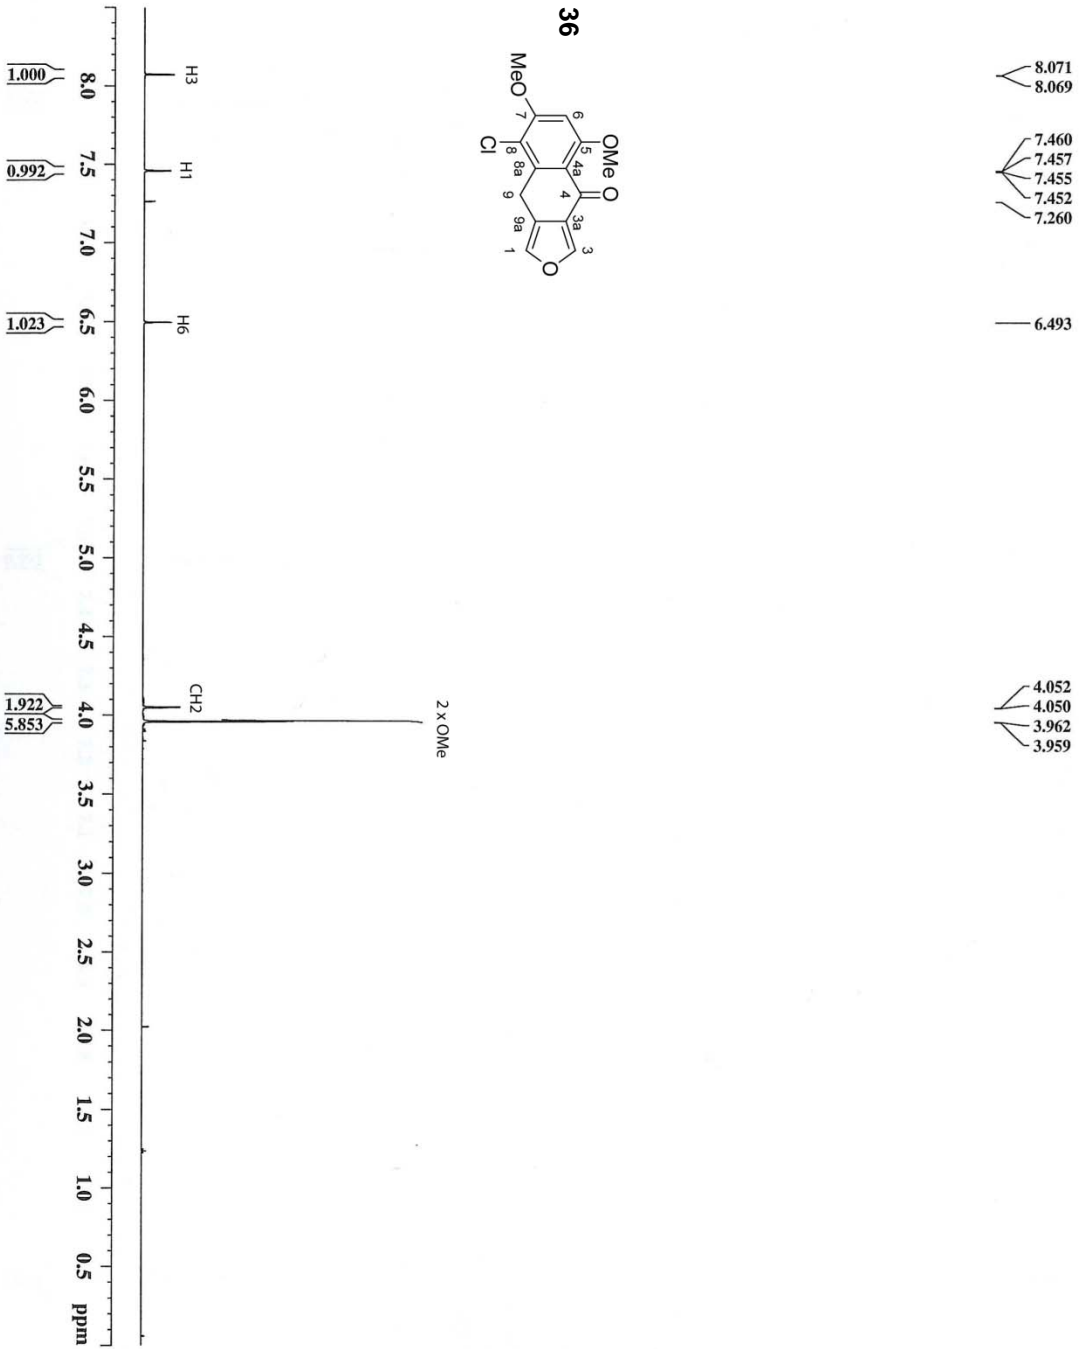

```

Current Data Parameters
NAME      kap03-Q46-01
EXPNO    2
PROCNO   1
PROCNO   1

F2 - Acquisition Parameters
Date_    20071212
Time     13:30
INSTRUM  spect
PROBHD   5 mm H1BO BB-
PULPROG  zg
TD        65536
SOLVENT  CDCl3
NS        16
DS         4
SWH       8992.318 Hz
FIDRES    0.137220 Hz
AQ        3.6439018 sec
RG         256
DE        55.600 usec
TE        298.0 K
D1        5.00000000 sec
MCREST    0.00000000 sec
MCCWRRK   0.01500000 sec

===== CHANNEL f1 =====
NUC1      1H
P1        5.00 usec
PL1       -3.00 dB
SFO1      600.1332688 MHz

F2 - Processing parameters
SI         65536
SF         600.1300162 MHz
WDW        no
SSB        0
LB         0.00 Hz
GB         0
PC         0.50
    
```



151 MHz <sup>13</sup>C NMR spectrum in CDCl<sub>3</sub>

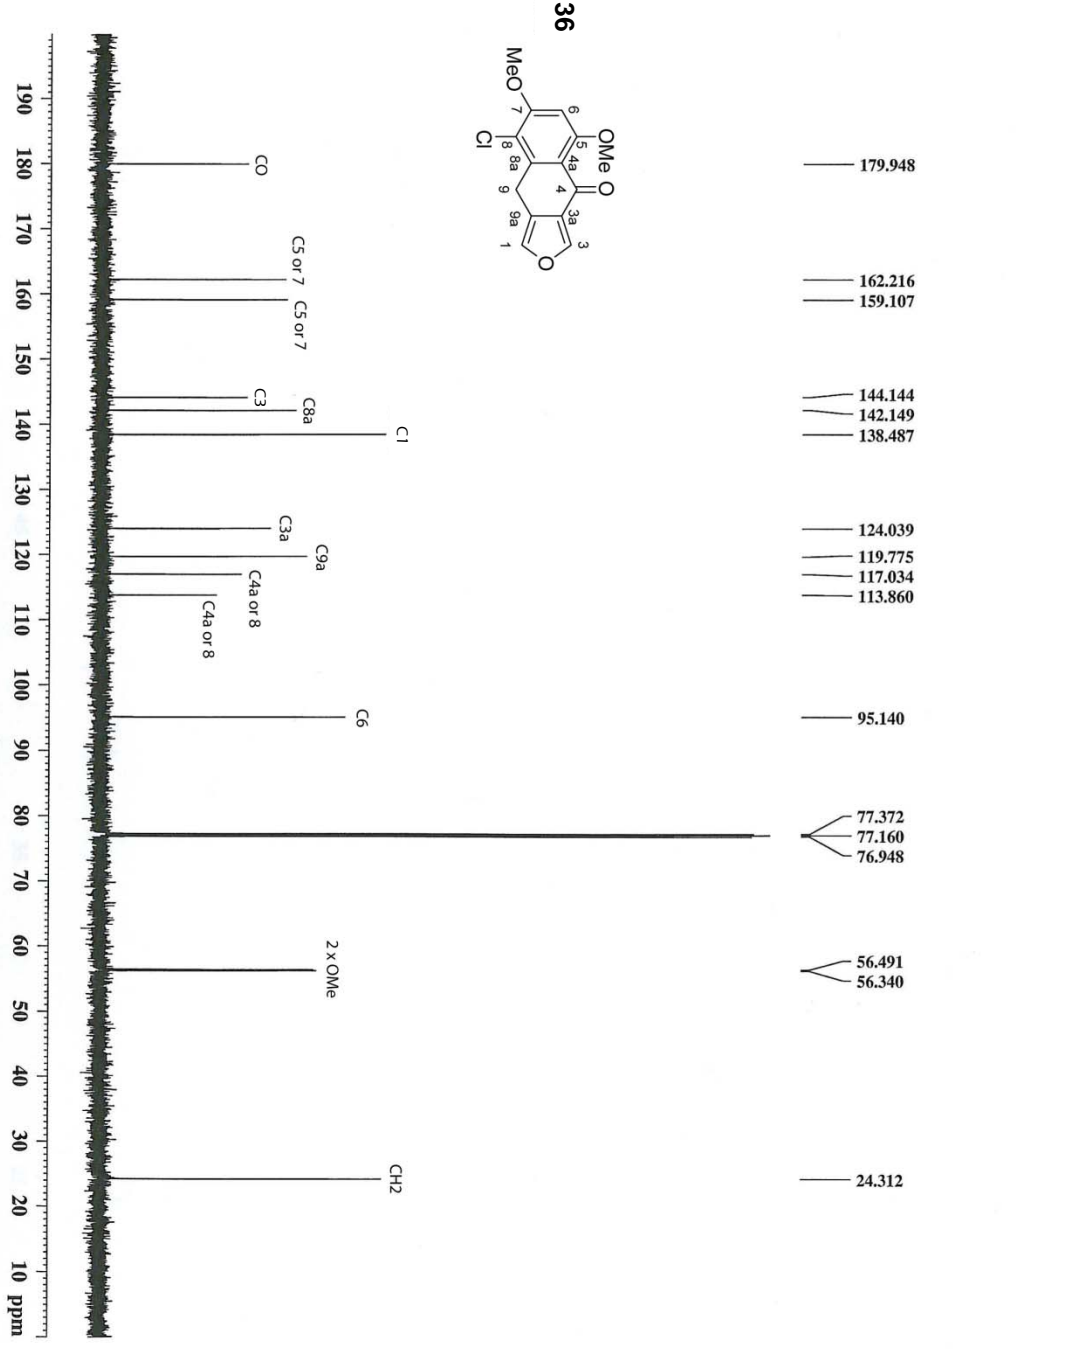

```

Current Data Parameters
NAME      kap03-046-01
EXPNO    3
PROCNO   1

F2 - Acquisition Parameters
Date_    20071212
Time     15.35
INSTRUM  spect
PROBHD   5 mm PHTBO BB-
PULPROG  zgpg
TD        65536
SOLVENT  60 CDCl3
NS        4
DS        4
SWH      37593.984 Hz
FIDRES   0.573639 Hz
AQ        0.8716921 sec
RG        16384
DW        13.300 usec
DE        7.00 usec
TE        298.0 K
D1        2.0000000 sec
d11       0.0300000 sec
DELTA    1.89999998 sec
MCREST   0.00000000 sec
MCWK     0.01500000 sec

===== CHANNEL f1 =====
NUC1      13C
P1        3.00 usec
PL1       -3.00 dB
SFO1     150.9147813 MHz

===== CHANNEL f2 =====
CPDPRG2   walz16
NUC2      1H
PCPD2     100.00 usec
PL2       120.00 dB
PL12      12.70 dB
PL13      22.00 dB
SFO2     600.1324500 MHz

F2 - Processing parameters
SI        65536
SF        150.9077963 MHz
WDW       EM
SSB       0
LB        1.00 Hz
GB        0
PC        0.50
    
```

300 MHz <sup>1</sup>H NMR spectrum in CDCl<sub>3</sub>

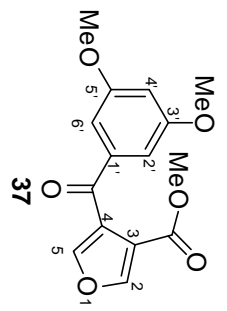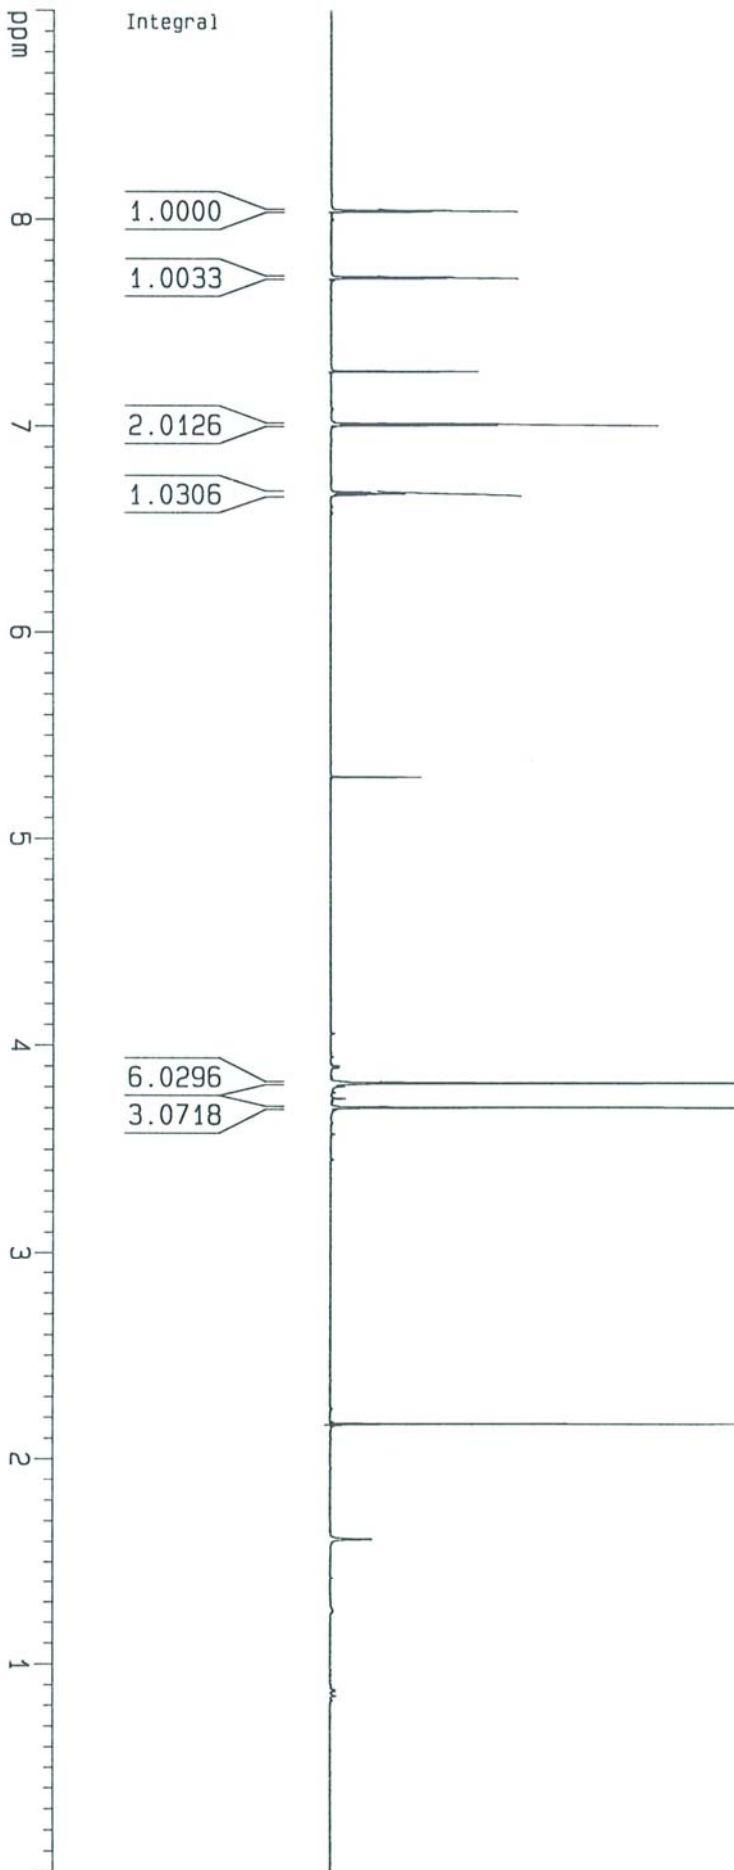

75.5 MHz <sup>1</sup>H NMR spectrum in CDCl<sub>3</sub>

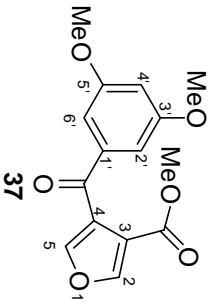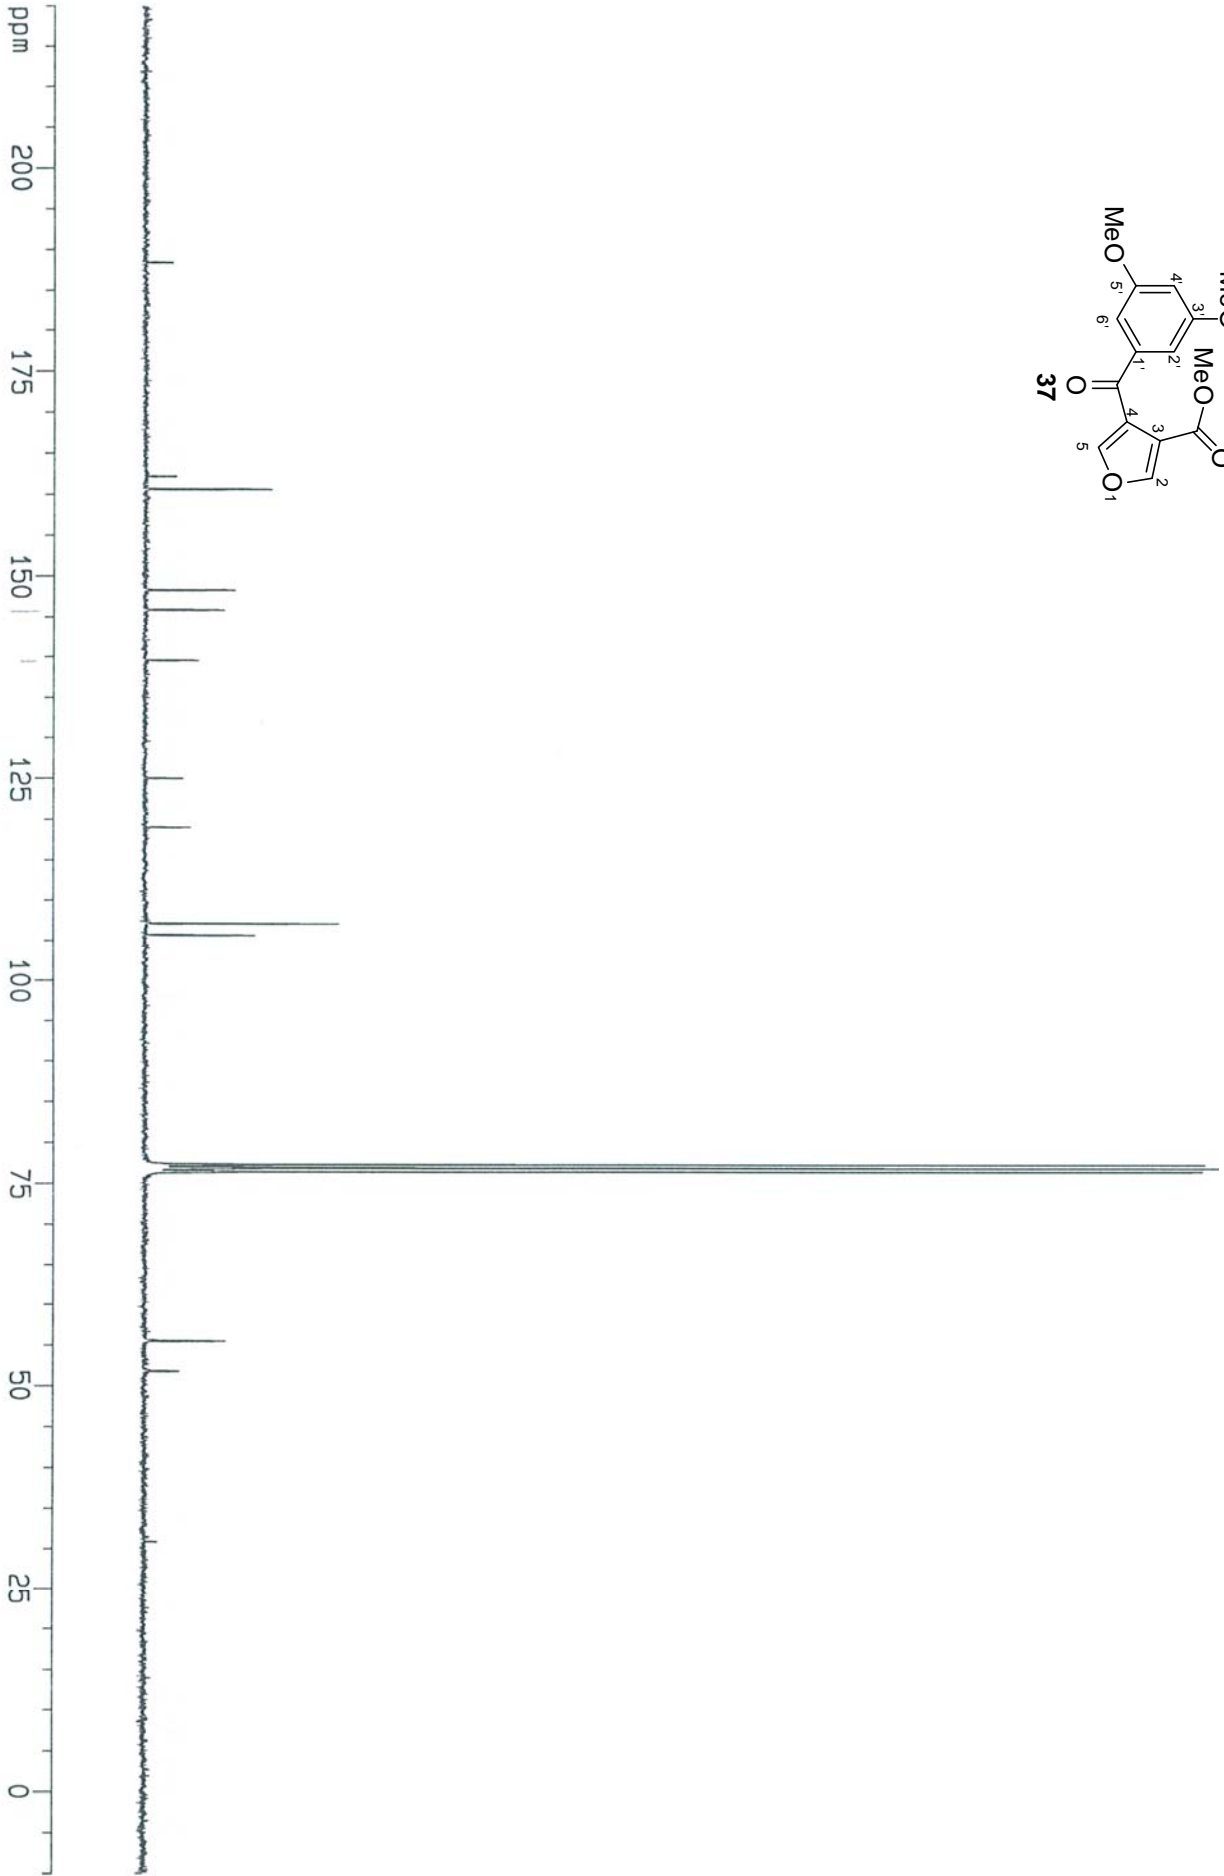

500 MHz <sup>1</sup>H NMR spectrum in CDCl<sub>3</sub>

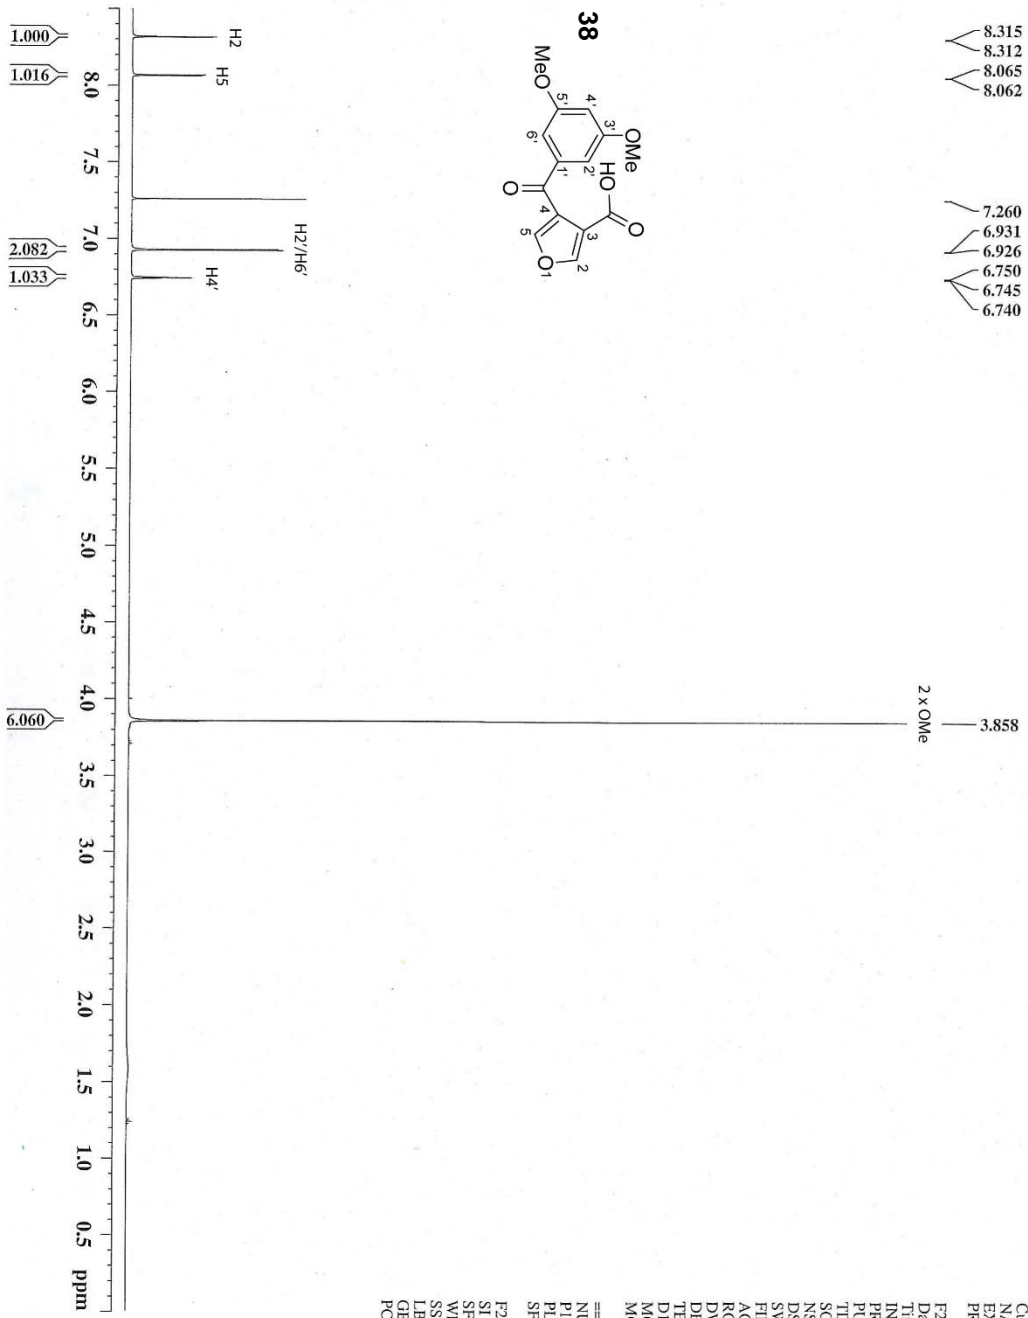

8.315  
8.312  
8.065  
8.062  
7.260  
6.931  
6.926  
6.750  
6.745  
6.740

2 x OMe  
3.858

1.000  
1.016  
2.082  
1.033  
6.060

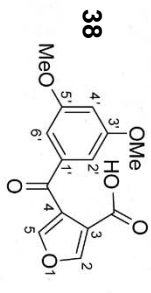

```

Current Data Parameters
NAME      Kap04-016-02
EXPNO    2
PROCNO   1

F2 - Acquisition Parameters
Date_    20090611
Time     15:32
INSTRUM  spect
PROBHD   5 mm Dual 13C/
PULPROG  zg30
TD        65536
SOLVENT  CDCl3
NS        16
DS        4
SWH       7507.507 Hz
FIDRES    0.114555 Hz
AQ        4.3648143 sec
RG        1290.2
DE        66.600 usec
TE        298.0 K
D1        5.000000000 sec
MCREST    0.000000000 sec
MCVWRK    0.015000000 sec

===== CHANNEL f1 =====
NUC1      1H
P1        12.70 usec
PL1       -1.00 dB
SFO1      500.1327500 MHz

F2 - Processing parameters
SI        65536
SF        500.1300226 MHz
WDW       no
SSB       0
LB        0.00 Hz
GB        0
PC        1.00
    
```

125.7 MHz <sup>13</sup>C NMR spectrum in CDCl<sub>3</sub>

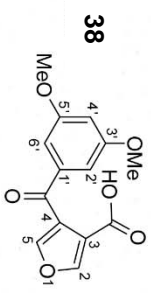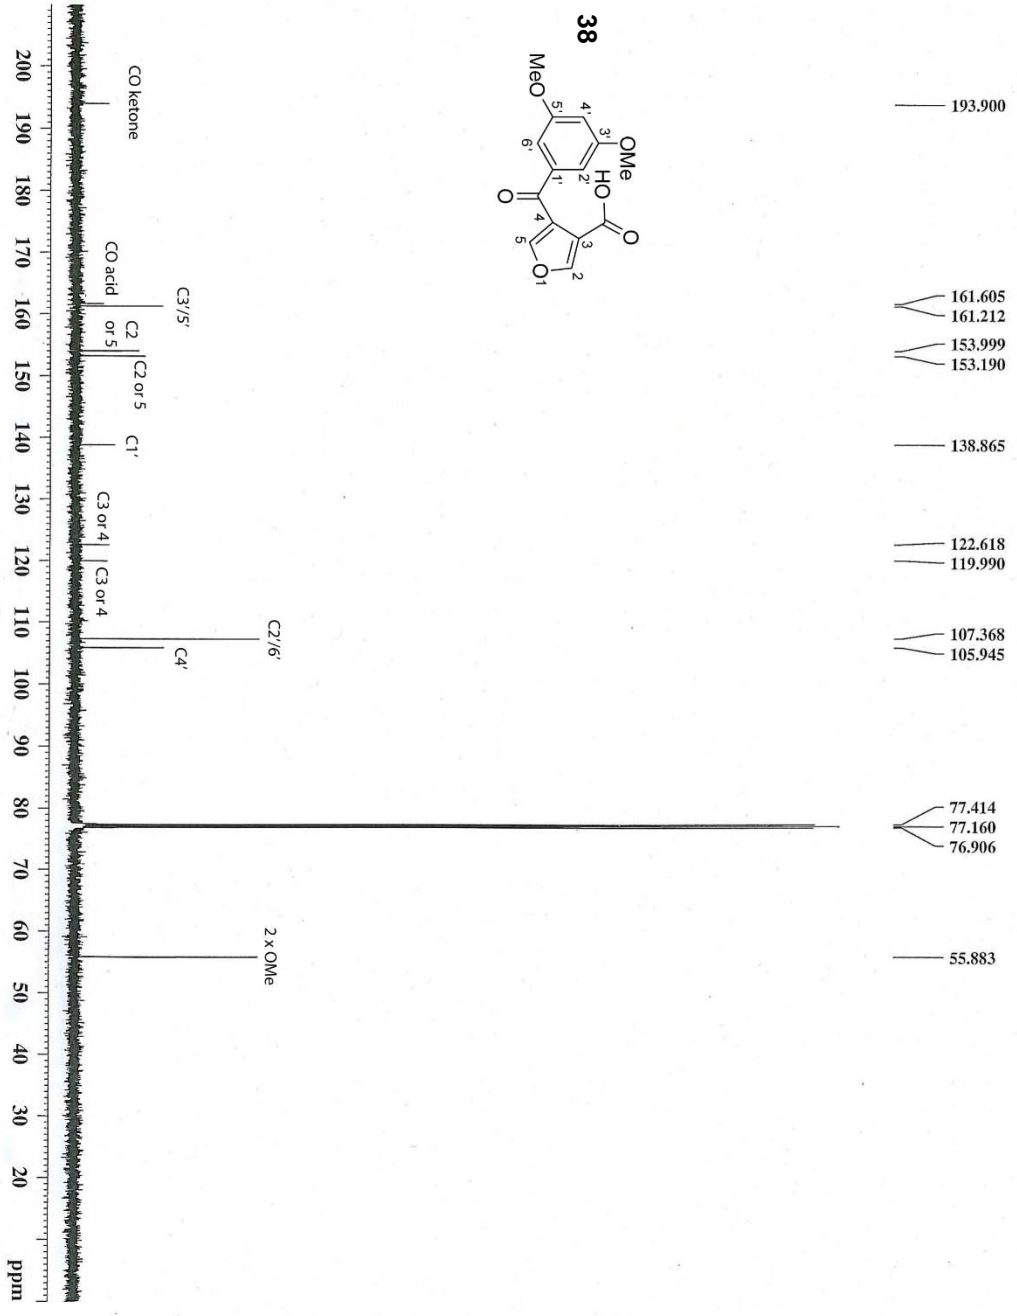

Current Data Parameters  
 NAME kap04-016-02  
 EXPNO 3  
 PROCNO 1

F2 - Acquisition Parameters  
 Date\_ 20090611  
 Time 15:37  
 INSTRUM spect  
 PROBHD 5 mm Dual 13C/  
 PULPROG zgpg30  
 TD 65536  
 SOLVENT 205 CDCl3  
 NS 4  
 DS 4  
 SWH 31446.541 Hz  
 FIDRES 0.479836 Hz  
 AQ 1.0420883 sec  
 RG 18390.4  
 DW 15.900 usec  
 DE 20.00 usec  
 TE 298.0 K  
 D1 2.00000000 sec  
 d11 0.03000000 sec  
 DELTA 1.89999998 sec  
 MCREST 0.00000000 sec  
 MCWRRK 0.015000000 sec

===== CHANNEL f1 =====  
 NUC1 <sup>13</sup>C  
 P1 14.00 usec  
 PL1 2.00 dB  
 SFO1 125.7709890 MHz

===== CHANNEL f2 =====  
 CPDPRG2 waltz16  
 NUC2 <sup>1</sup>H  
 P1 100.00 usec  
 PCPD2 120.00 dB  
 PL2 16.00 dB  
 PL12 20.00 dB  
 PL13 500.1322500 MHz  
 SFO2 500.1322500 MHz

F2 - Processing parameters  
 SI 65536  
 SF 125.7577741 MHz  
 WDW EM  
 SSB 0  
 LB 1.00 Hz  
 GB 0  
 PC 1.00

300 MHz <sup>1</sup>H NMR spectrum in CDCl<sub>3</sub>

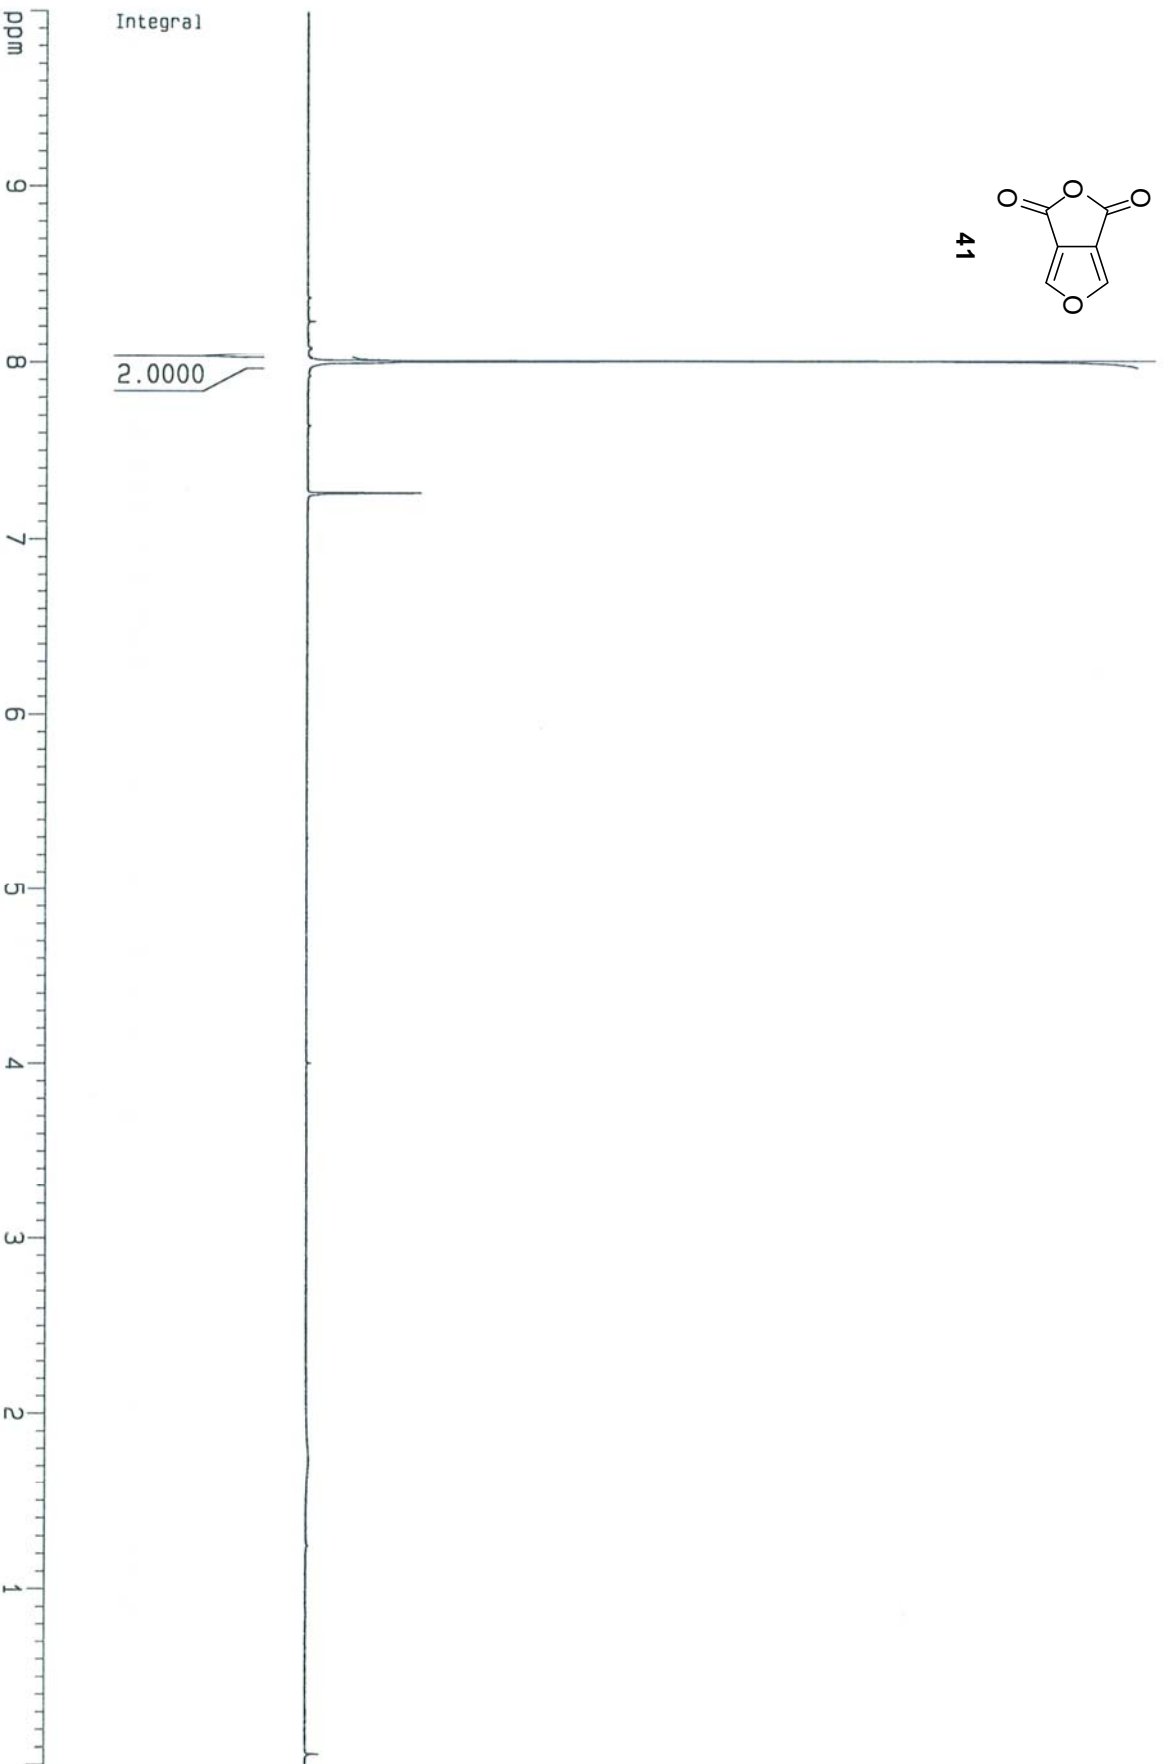

75.5 MHz  $^{13}\text{C}$  NMR spectrum in  $\text{CDCl}_3$

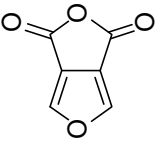

41

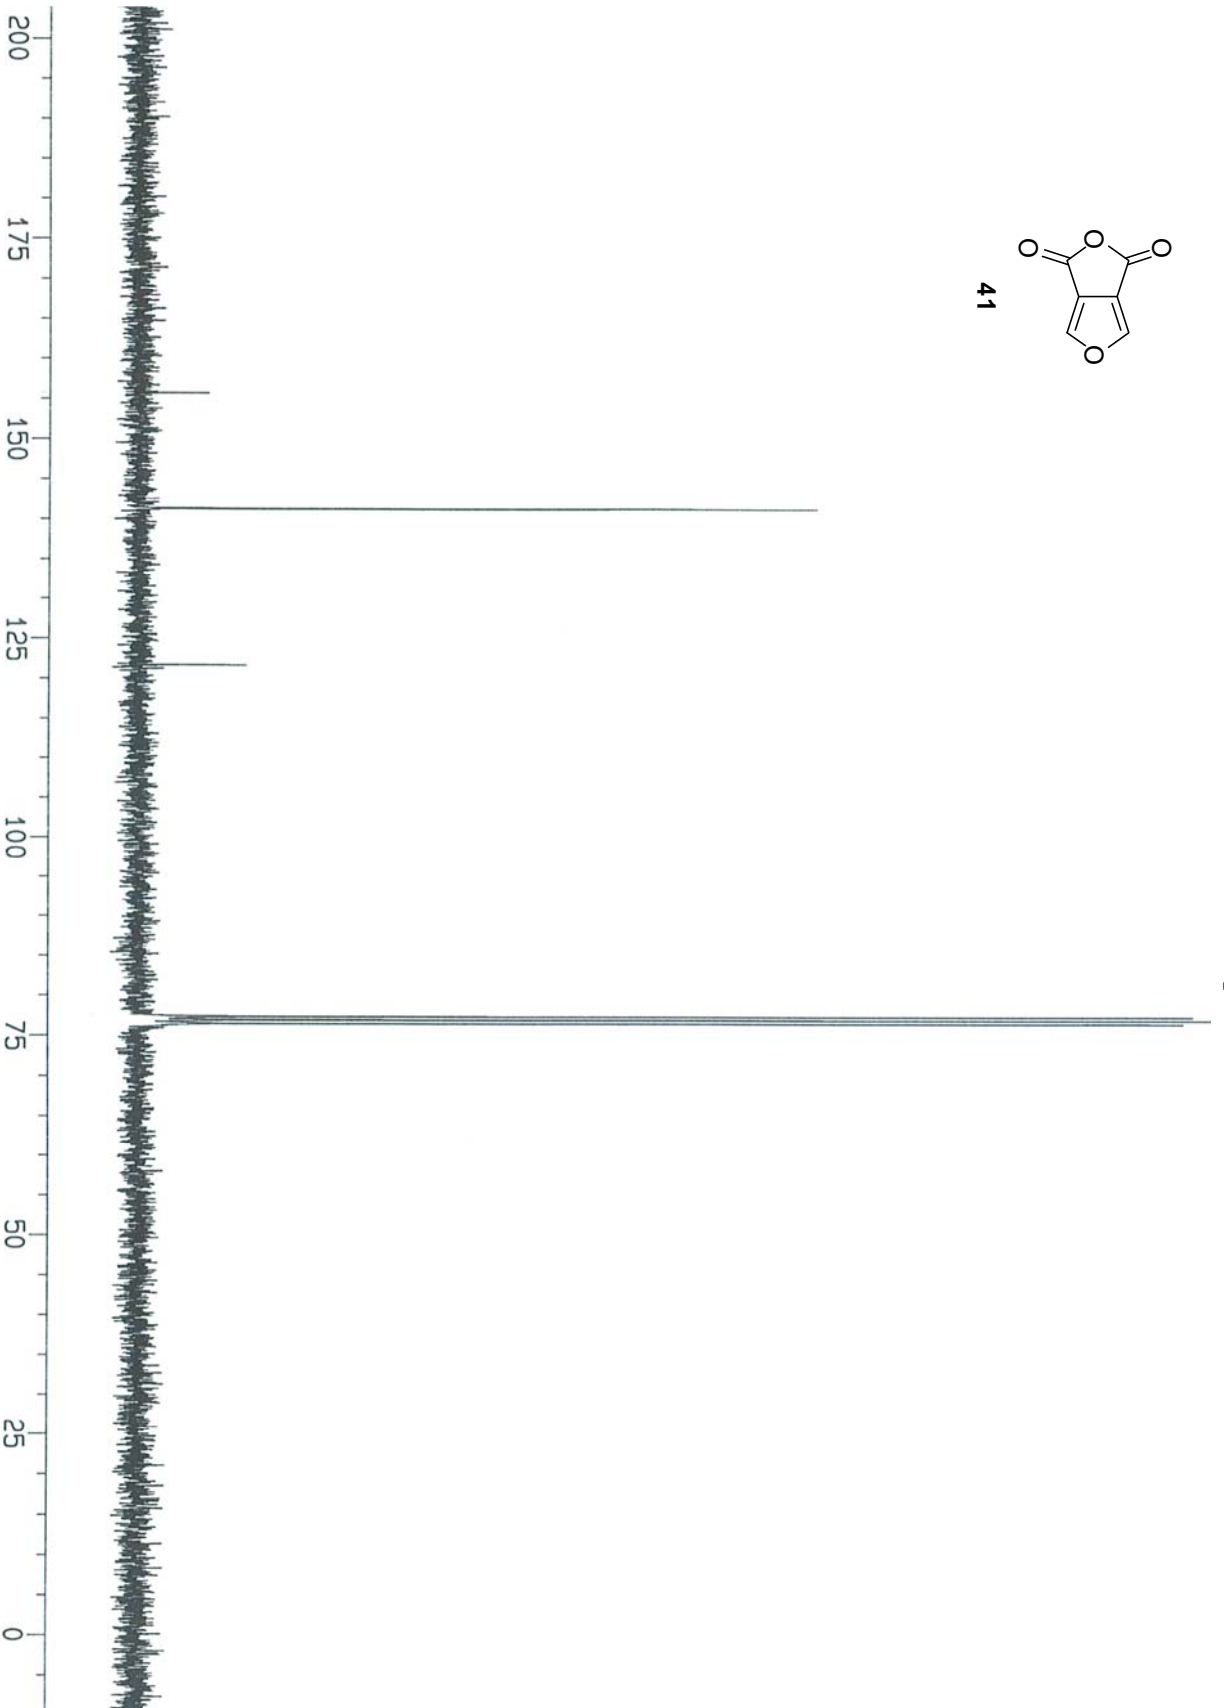





500 MHz <sup>1</sup>H NMR spectrum in CDCl<sub>3</sub>

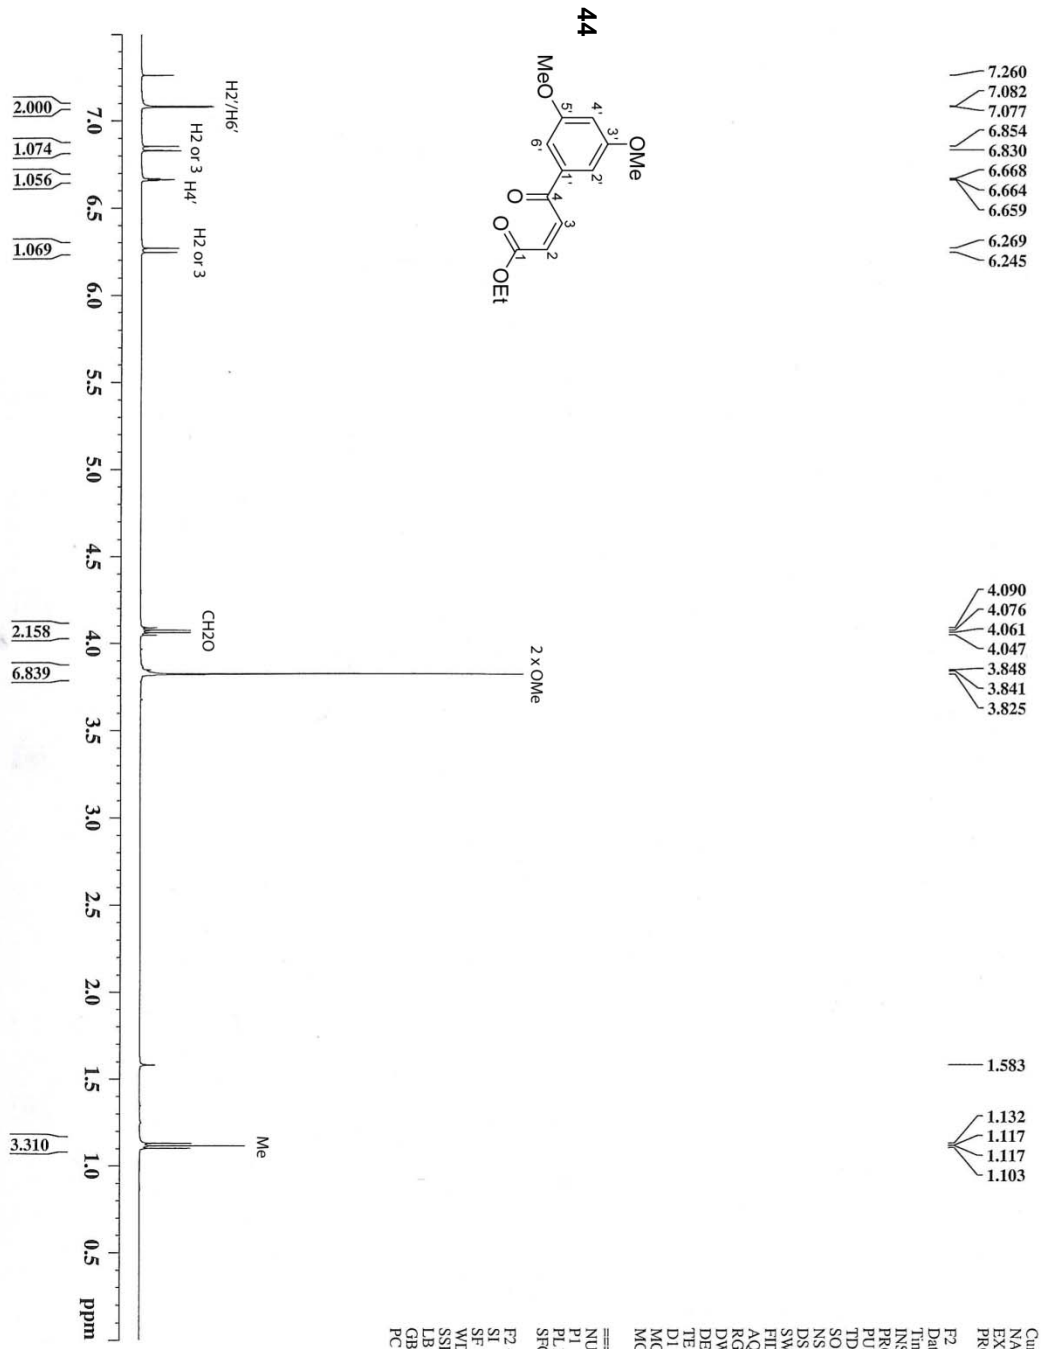

Current Data Parameters  
 NAME kapalkem02  
 EXPNO 2  
 PROCNO 1

F2 - Acquisition Parameters  
 Date\_ 20101030  
 Time 12.12  
 INSTRUM spect  
 PROBHD 5 mm Dual 13C/  
 PULPROG zg30  
 TD 65536  
 SOLVENT 8 CDCl3  
 NS 4  
 DS 4  
 SFO1 7501.507 Hz  
 FIDRES 0.114555 Hz  
 AQ 4.3648143 sec  
 RG 645.1  
 DE 66.600 usec  
 DW 7.50 usec  
 TE 298.0 K  
 D1 5.00000000 sec  
 MCREST 0.00000000 sec  
 MCW/RK 0.01500000 sec

===== CHANNEL f1 =====  
 NUC1 1H  
 P1 12.70 usec  
 PL1 -1.00 dB  
 SFO1 500.1327500 MHz

F2 - Processing parameters  
 SI 65536  
 SF 500.1300231 MHz  
 WDW no  
 SSB 0  
 LB 0.00 Hz  
 GB 0  
 PC 1.00

125.8 MHz <sup>13</sup>C NMR spectrum in CDCl<sub>3</sub>

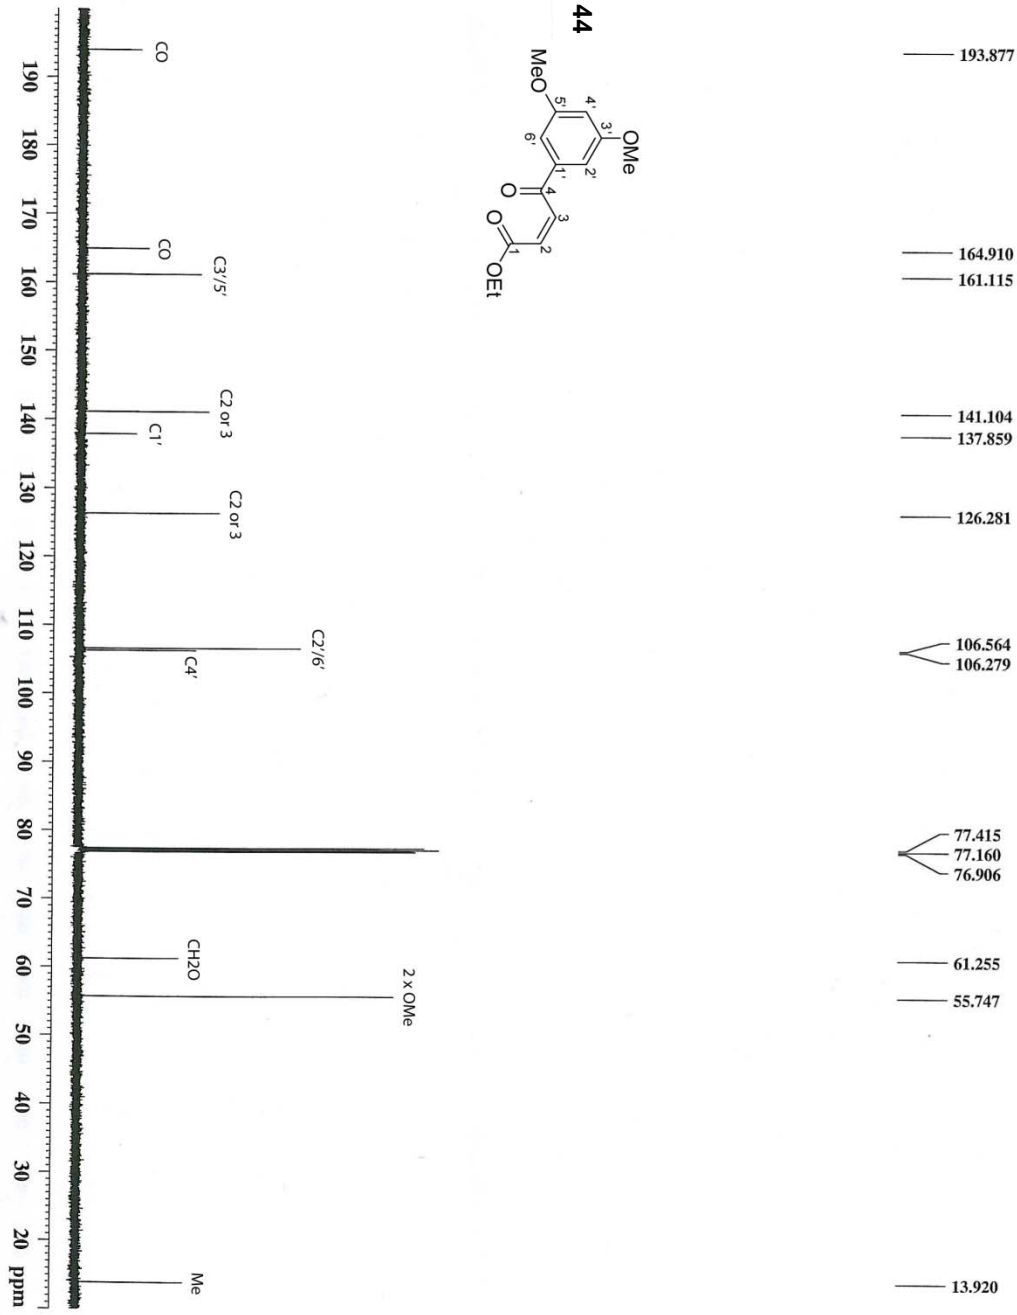

Current Data Parameters  
 NAME kapalkenc02  
 EXPNO 3  
 PROCNO 1

F2 - Acquisition Parameters  
 Date\_ 20101030  
 Time 11.56  
 INSTRUM spect  
 PROBHD 5 mm Dual 13C/  
 PULPROG zgpg30  
 TD 65536  
 SOLVENT CDCl3  
 NS 362  
 DS 4  
 SWH 31446.541 Hz  
 FIDRES 0.479836 Hz  
 AQ 1.0420883 sec  
 RG 20642.5  
 DW 15.900 usec  
 DE 20.00 usec  
 TE 298.0 K  
 D1 2.00000000 sec  
 d11 0.03000000 sec  
 DELTA 1.89999998 sec  
 MCREST 0.00000000 sec  
 MCWRRK 0.01300000 sec

==== CHANNEL f1 =====  
 NUC1 <sup>13</sup>C  
 P1 14.00 usec  
 PL1 2.00 dB  
 SFO1 125.7709890 MHz

==== CHANNEL f2 =====  
 CPDPRG2 waltz16  
 NUC2 <sup>1</sup>H  
 NU2 100.00 usec  
 PCPD2 120.00 dB  
 PL2 16.00 dB  
 PL12 16.00 dB  
 PL13 20.00 dB  
 SFO2 500.1322500 MHz

F2 - Processing parameters  
 SI 65536  
 SF 125.7577750 MHz  
 WDW no  
 SSB 0  
 LB 0.00 Hz  
 GB 0  
 PC 1.00

400 MHz <sup>1</sup>H NMR spectrum in CDCl<sub>3</sub>

Automation directory: /home/piggott/vmrcsys/data/auco\_2007.11.18\_02  
 File: kap02-147-0201 /data/mrg-Prot\_01.f1d  
 Sample id: kap02-147-0201  
 Sample: kap02-147-02

Pulse Sequence: s2pul  
 Solvent: cdcl3  
 Temp: 25.0 C / 298.1 K  
 Operator: piggott  
 File: mrg-Prot\_01  
 VNMRS-400 "var/400"

Relax. delay 5.000 sec  
 Pulse 45.0 degrees  
 Acq. time 4.992 sec  
 Width 6410.3 Hz  
 16 Repetitions  
 OBSERVE: H1, 399.8555185 MHz  
 PULPROG: zgpg30  
 FT size: 131072  
 Total time 3 min, 0 sec

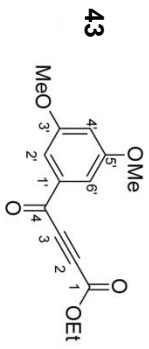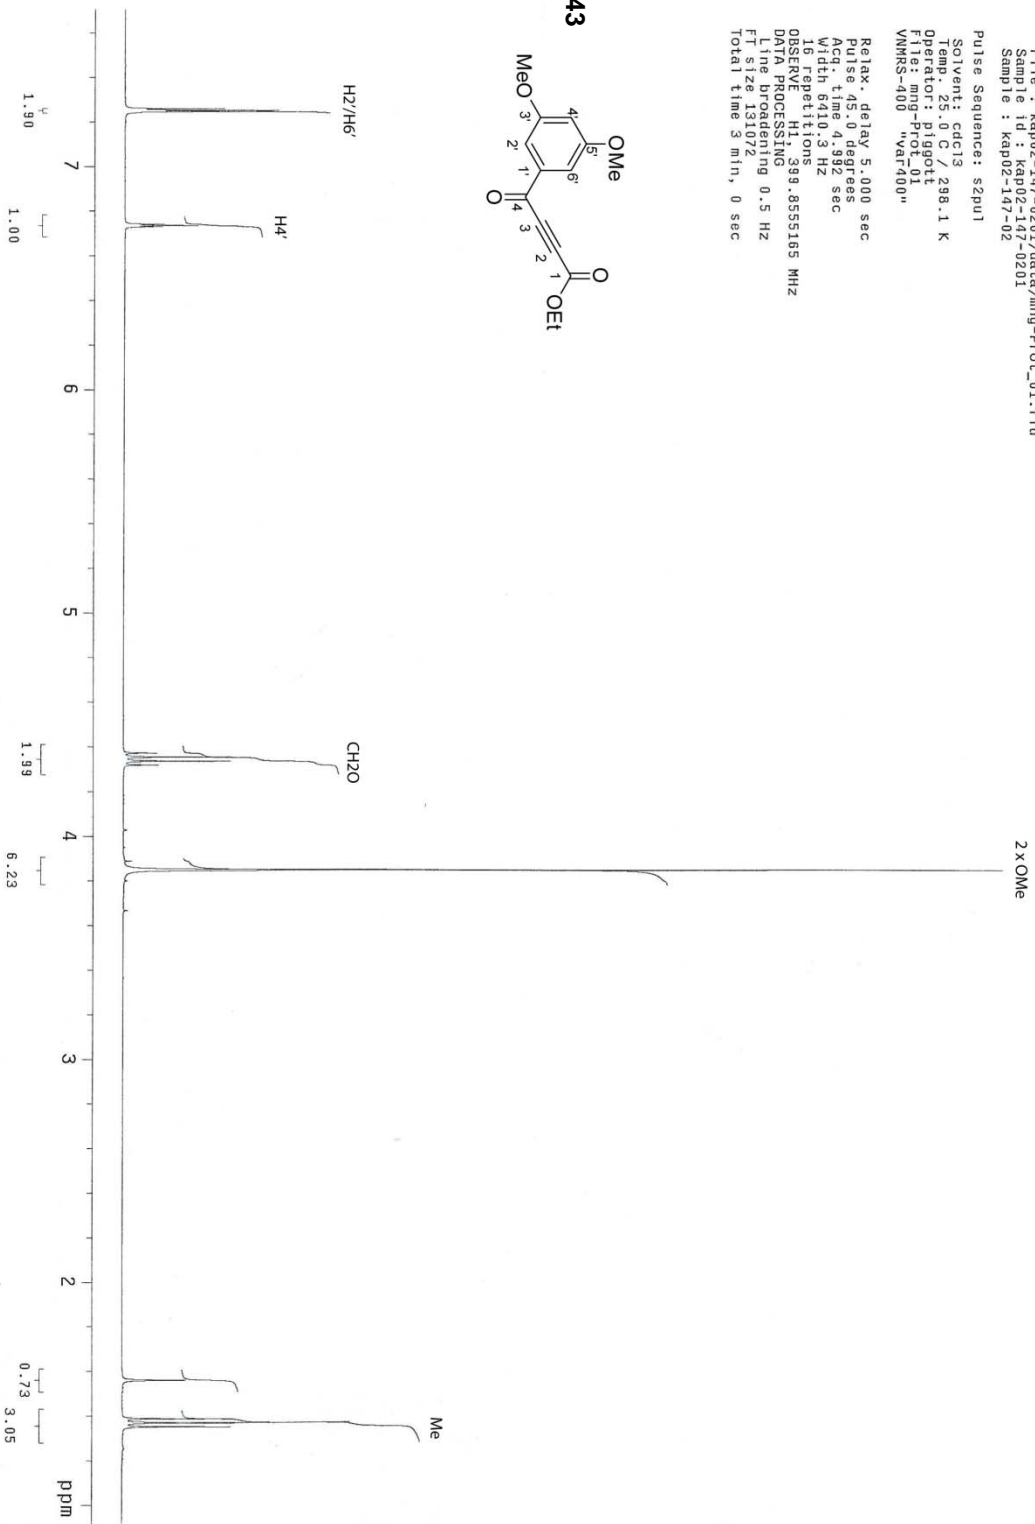

# 100 MHz <sup>13</sup>C NMR spectrum in CDCl<sub>3</sub>

Automation directory: /home/piggett/vnmr/sys/data/auto\_2007.11.18\_02

File exp  
 Sample id : tmpstudy  
 Sample : kap02-147-02

Pulse Sequence: s2pul  
 Solvent: cdcl3  
 Temp: 25.0 C / 298.1 K  
 Operator: piggett  
 VNMRS-400 "var400"

Relax. delay 1.000 sec  
 Pulse 45.0 degrees  
 Acq. time 1.300 sec  
 Width 24509.8 Hz  
 256 repetitions  
 OBSERVE C13, 100.5437335 MHz  
 DECOUPLE H1, 399.8575230 MHz  
 continuously on  
 WALTZ-16 modulated  
 DATA PROCESSING  
 Line broadening 0.5 Hz  
 FT size 65536  
 Total time 38 min, 29 sec

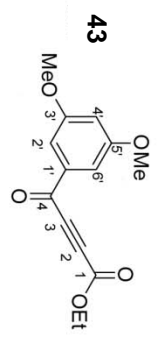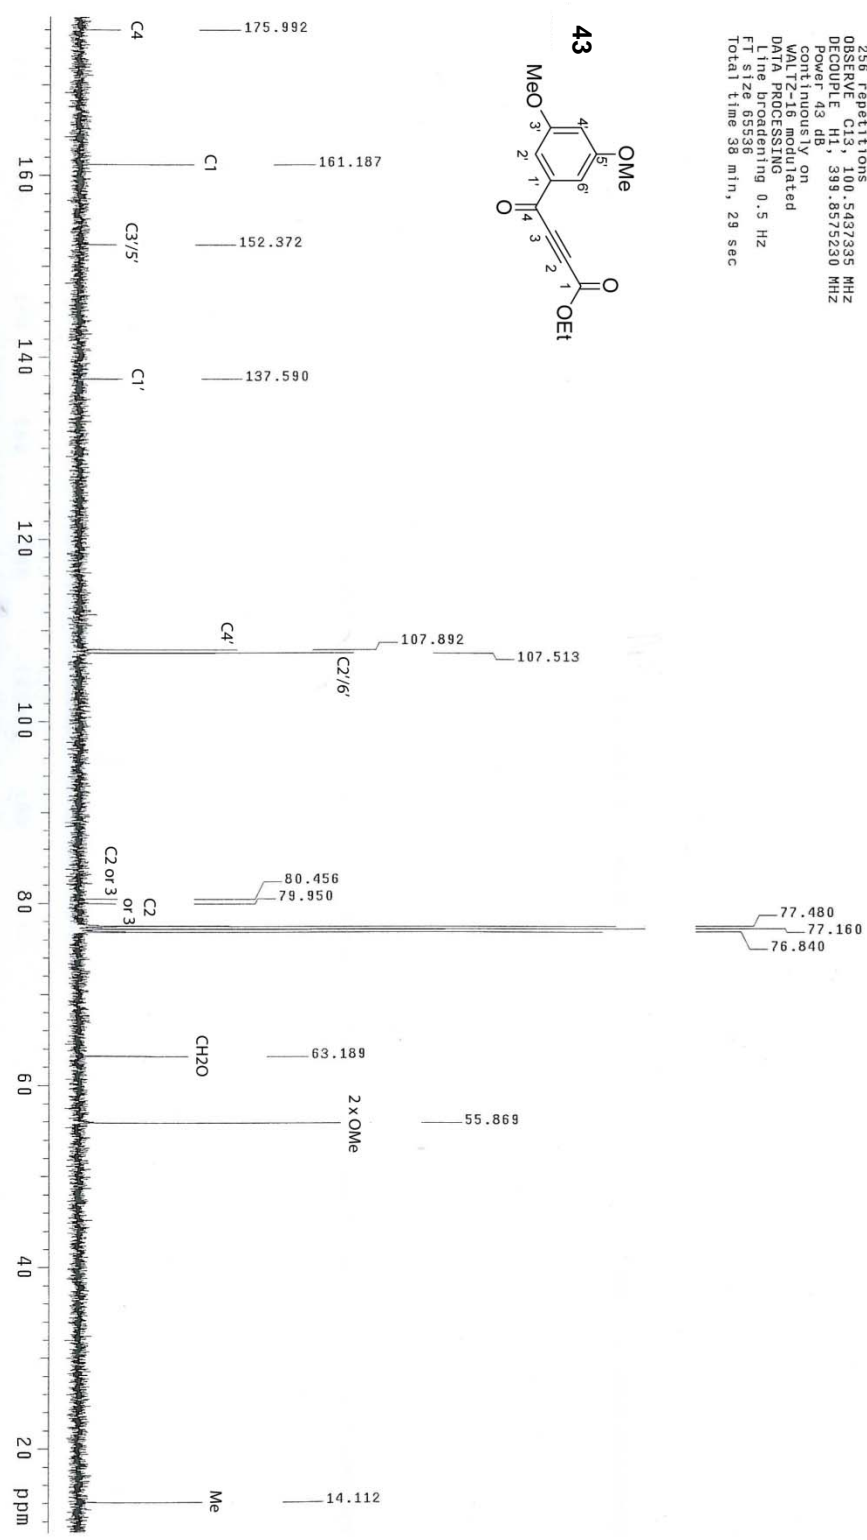

500 MHz <sup>1</sup>H NMR spectrum in CDCl<sub>3</sub>

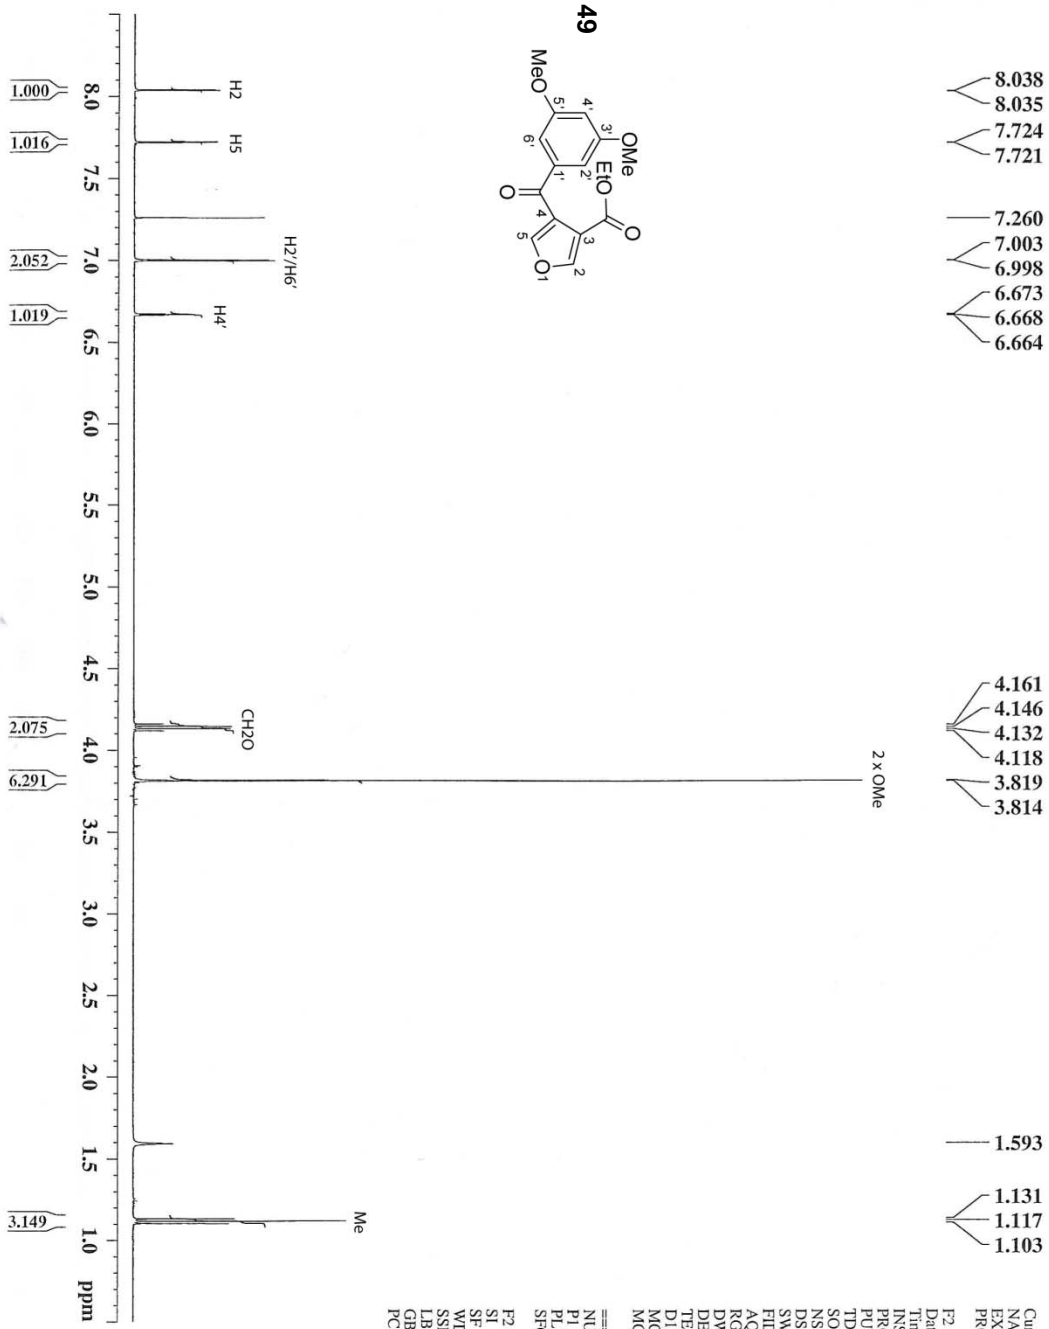

8.038  
8.035  
7.724  
7.721  
7.260  
7.003  
6.998  
6.673  
6.668  
6.664

4.161  
4.146  
4.132  
4.118  
3.819  
3.814

1.593

1.131  
1.117  
1.103

Current Data Parameters  
 NAME karp03-40-02  
 EXPNO 2  
 PROCNO 1  
 F2 - Acquisition Parameters  
 Date\_ 20080326  
 Time\_ 11.26  
 INSTRUM spect  
 PROBHD 5 mm DAI 13C/  
 PULPROG zg30  
 TD 65536  
 SOLVENT CDCl3  
 NS 8  
 DS 4  
 SWH 7507.507 Hz  
 FIDRES 0.114555 Hz  
 AQ 4.3648143 sec  
 RG 1024  
 DE 66.600 usec  
 DW 7.50 usec  
 TE 298.0 K  
 D1 5.00000000 sec  
 MCREST 0.00000000 sec  
 MCVW 0.01500000 sec  
 MCVW2 0.01500000 sec  
 ===== CHANNEL f1 =====  
 NUC1 1H  
 P1 12.70 usec  
 PL1 -1.00 dB  
 SFO1 500.1327500 MHz  
 F2 - Processing parameters  
 SI 65536  
 SF 500.1300229 MHz  
 WDW EM  
 SSB 0  
 LB 0.00 Hz  
 GB 0  
 PC 1.00

125.7 MHz <sup>13</sup>C NMR spectrum in CDCl<sub>3</sub>

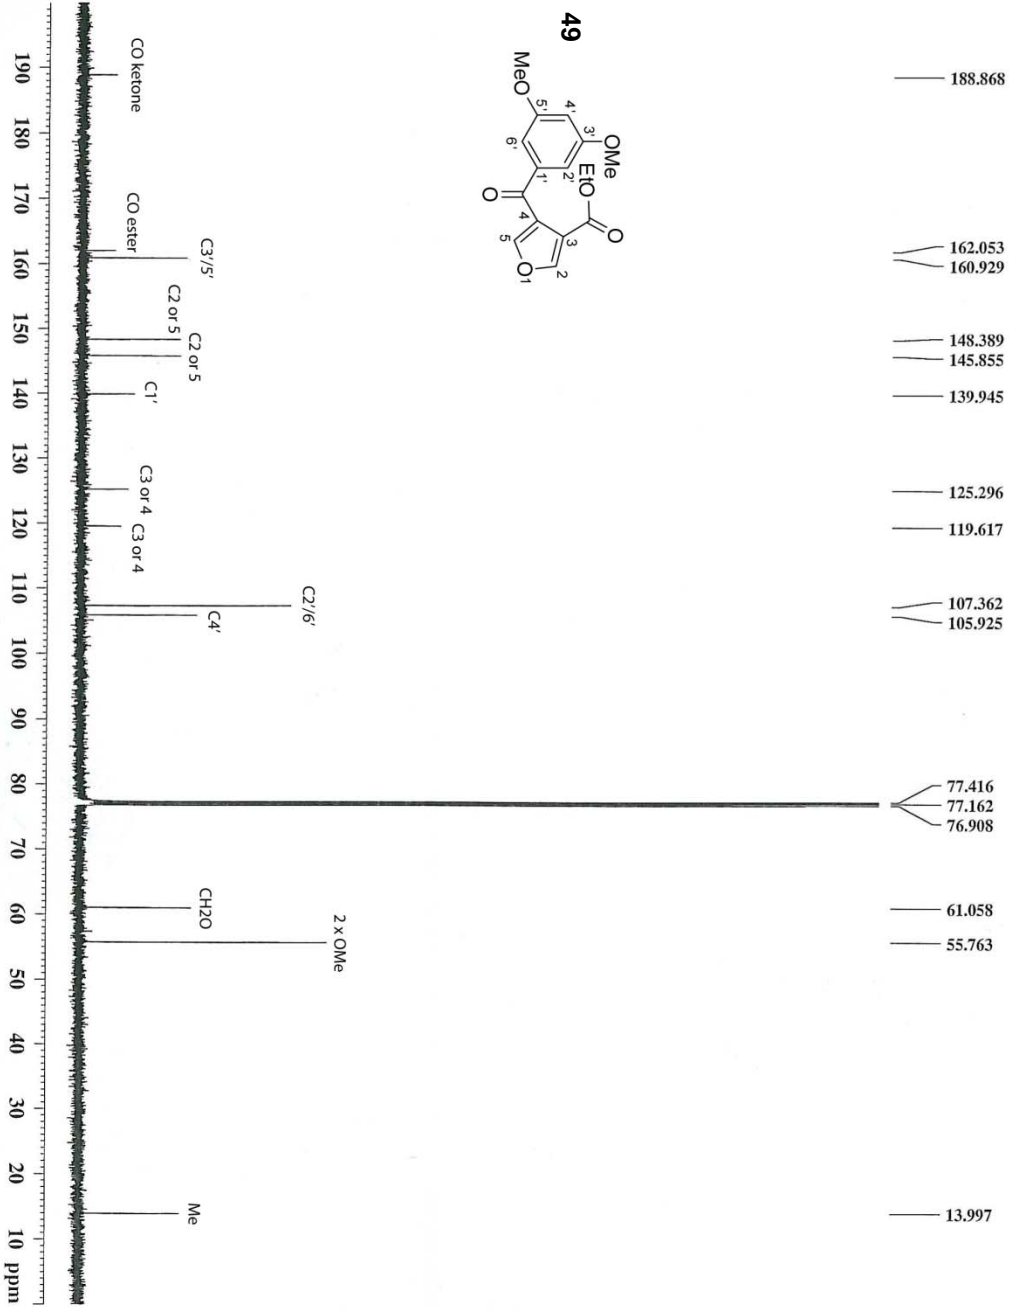

```

Current Data Parameters
NAME      kap03--40-02
EXPNO    3
PROCNO   1

F2 - Acquisition Parameters
Date_    20080326
Time     10:48
INSTRUM  spect
PROBHD   5 mm Dual 13C/
PULPROG  zgpg30
TD        65536
SOLVENT  CDCl3
NS        288
DS        4
SWH       31446.541 Hz
FIDRES   0.479836 Hz
AQ        1.0420883 sec
RG        23170.5
DW        15.900 usec
DE        20.00 usec
TE        298.0 K
D1        2.000000000 sec
d11       0.030000000 sec
DELTA    1.899999998 sec
MCREST   0.000000000 sec
MCWRRK   0.015000000 sec

===== CHANNEL f1 =====
NUC1      13C
P1        14.00 usec
PL1       2.00 dB
SFO1     125.7709890 MHz

===== CHANNEL f2 =====
GPDPRG2   waltz16
NUC2      1H
PCPD2     100.00 usec
PL2       120.00 dB
PL12      16.00 dB
PL13      20.00 dB
SFO2     500.1322500 MHz

F2 - Processing parameters
SI        65536
SF        125.7577741 MHz
WDW       EM
SSB       0
LB        1.00 Hz
GB        0
PC        1.00
    
```

500 MHz <sup>1</sup>H NMR spectrum in CDCl<sub>3</sub>

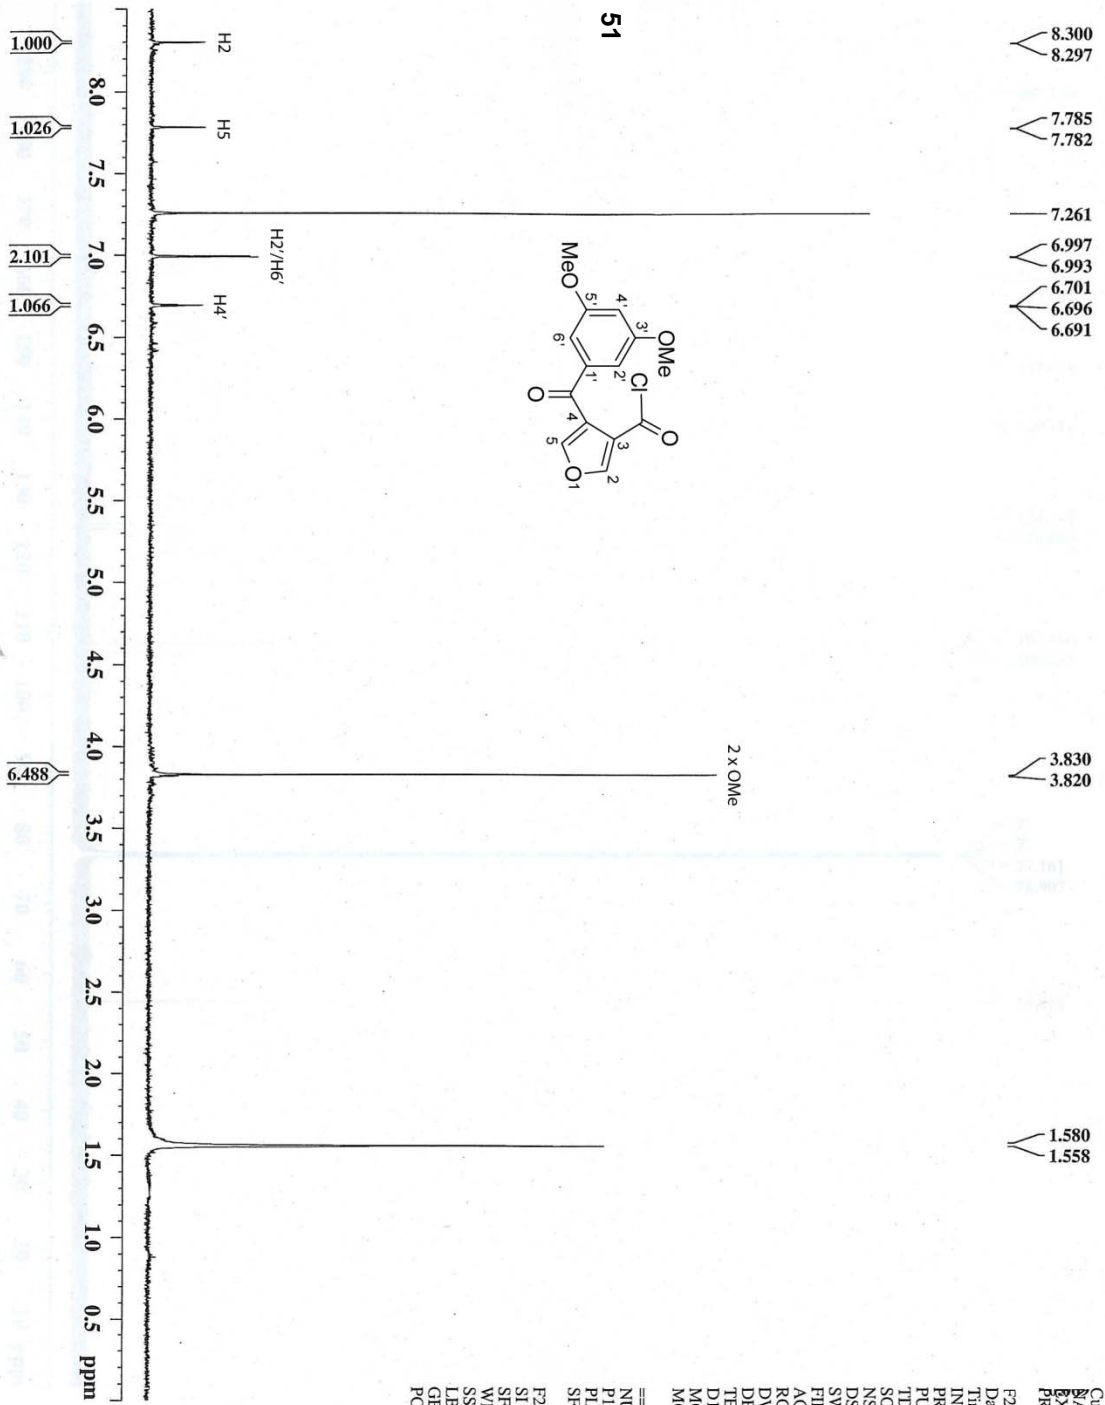

Current Data Parameters  
 NAME ksp04-142-02  
 EXPNO 1  
 PROCNO 1

F2 - Acquisition Parameters  
 Date\_ 20100506  
 Time 17.45  
 INSTRUM spect  
 PROBHD 5 mm Dual 13C/  
 PULPROG zg30  
 TD 32768  
 SOLVENT CDCl3  
 NS 1  
 DS 0  
 SWH 8992.806 Hz  
 FIDRES 0.274439 Hz  
 AO 1.822063 sec  
 RG 2298.8  
 DW 55.600 usec  
 DE 7.50 usec  
 TE 298.0 K  
 D1 0.50000000 sec  
 MCREST 0.00000000 sec  
 MCWRRK 0.01500000 sec

==== CHANNEL f1 =====  
 NUC1 1H  
 P1 12.70 usec  
 PL1 -1.00 dB  
 SFO1 500.1327500 MHz

F2 - Processing parameters  
 SI 16384  
 SF 500.1300231 MHz  
 WDW no  
 SSB 0  
 LB 0.00 Hz  
 GB 0  
 PC 0.20

125.7 MHz <sup>13</sup>C NMR spectrum in CDCl<sub>3</sub>

Current Data Parameters  
 NAME kap04-142-02  
 EXPNO 3  
 PROCNO 1

F2 - Acquisition Parameters  
 Date\_ 20100506  
 Time 17:51

INSTRUM spect  
 PROBHD 5 mm Dual 13C/  
 PULPROG zgpg30  
 TD 65536  
 SOLVENT CDCl3  
 NS 17313

DS 4  
 SWH 31446.541 Hz  
 FIDRES 0.479836 Hz  
 AQ 1.0420883 sec

RG 23170.5  
 DW 15.900 usec  
 DE 20.00 usec  
 TE 298.0 K

D1 2.00000000 sec  
 d11 0.03000000 sec  
 DELTA 1.89999998 sec  
 MCREST 0.00000000 sec  
 MCWRRK 0.01500000 sec

==== CHANNEL f1 =====  
 NUC1 <sup>13</sup>C  
 P1 14.00 usec  
 PL1 2.00 dB  
 SFO1 125.7709890 MHz

==== CHANNEL f2 =====  
 CPDPRG2 walz16  
 NUC2 <sup>1</sup>H  
 PCPD2 100.00 usec  
 PL2 120.00 dB  
 PL12 16.00 dB  
 PL13 20.00 dB  
 SFO2 500.1322500 MHz

F2 - Processing parameters  
 SI 65556  
 SF 125.7577736 MHz  
 WDW no  
 SSB 0  
 LB 0.00 Hz  
 GB 0  
 PC 1.00

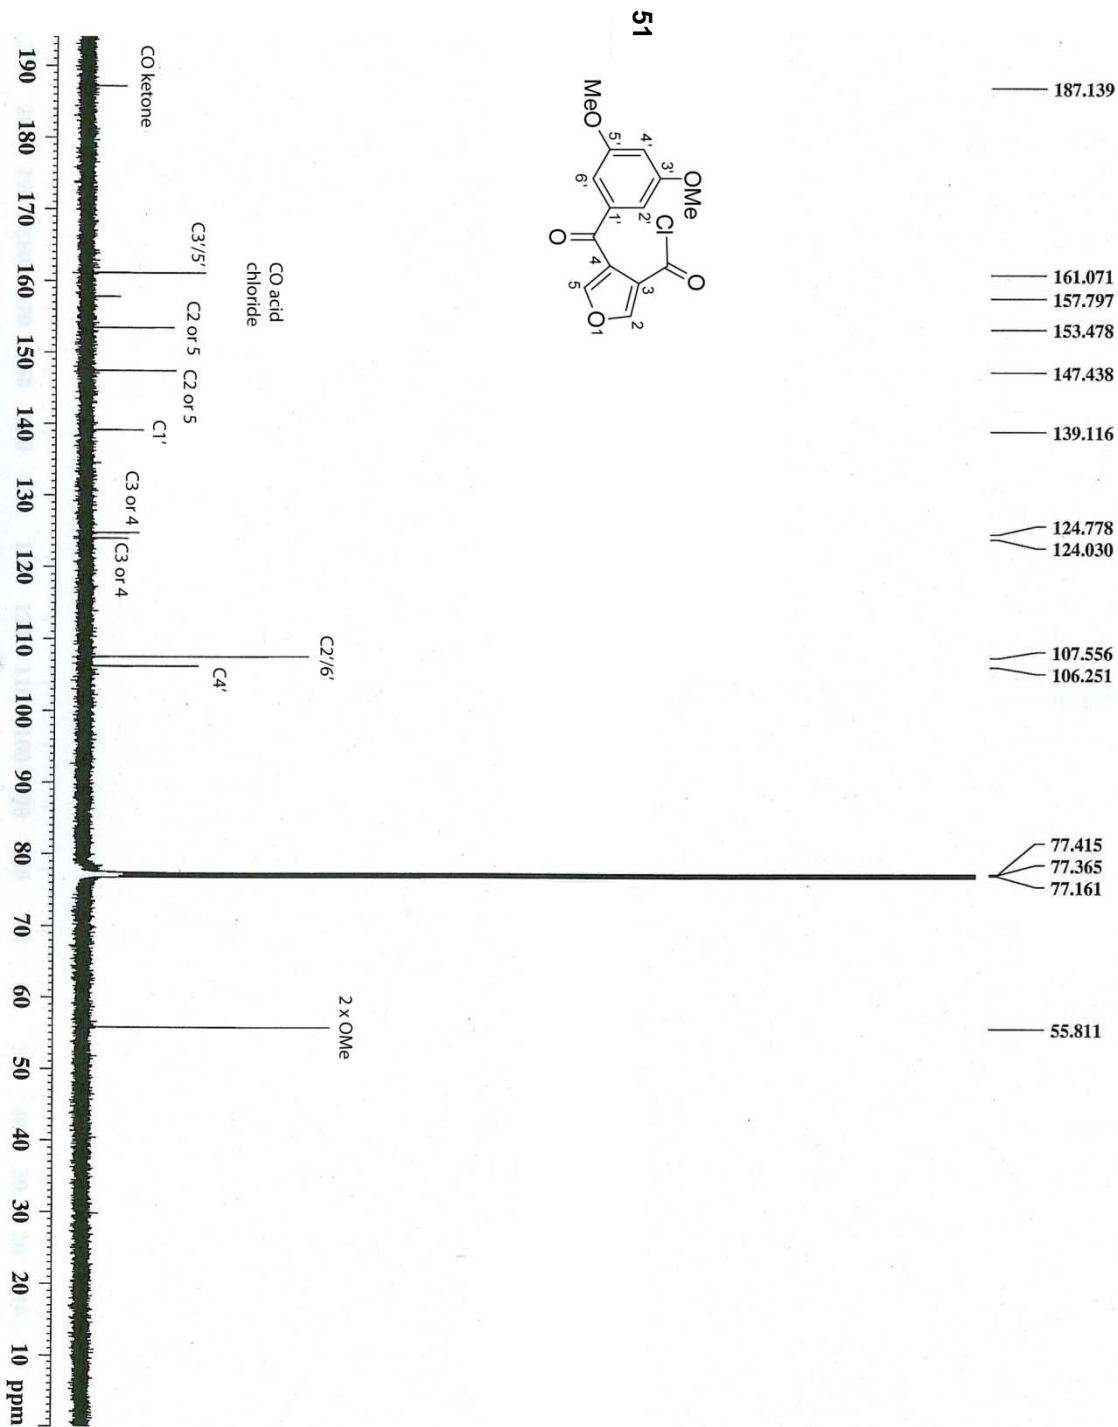



500 MHz <sup>1</sup>H NMR spectrum in CDCl<sub>3</sub>

8.203  
8.200  
8.187  
8.185  
7.372  
7.367  
7.260  
7.259  
6.694  
6.689

3.933

1.563

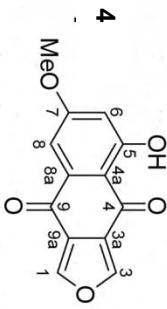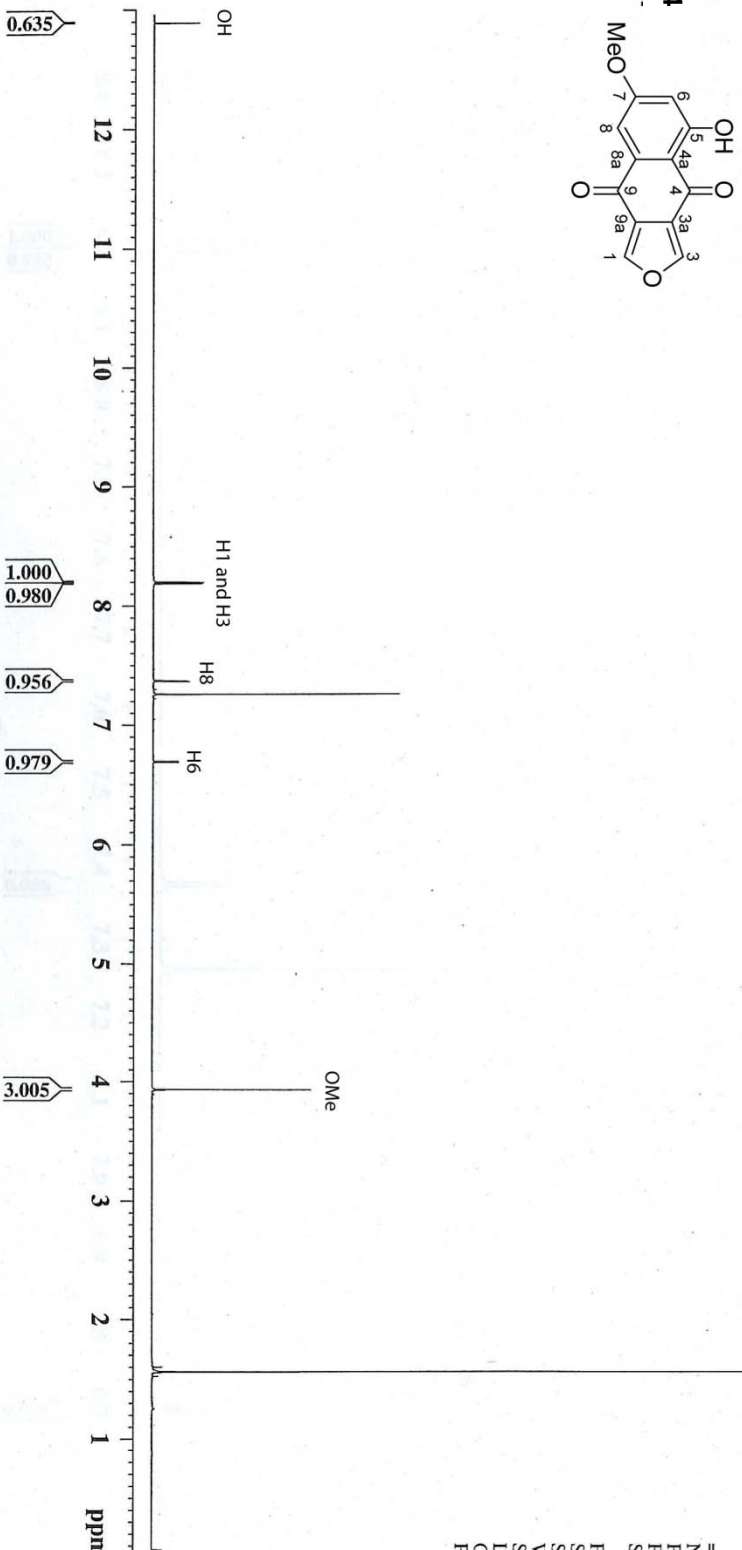

Current Data Parameters  
NAME kap04-144-04  
EXPNO 2  
PROCNO 1

F2 - Acquisition Parameters  
Date\_ 20100528  
Time 9.03

INSTRUM spect  
PROBHD 5 mm Dual 13C/  
PULPROG zg30

TD 65536  
SOLVENT CDCl3  
NS 8  
DS 4

SWH 7507.507 Hz  
FIDRES 0.114555 Hz  
AQ 4.3648143 sec  
RG 3251  
DW 66.600 usec  
DE 7.50 usec  
TE 298.0 K

D1 5.00000000 sec  
MCREST 0.00000000 sec  
MCVPRK 0.01500000 sec

===== CHANNEL f1 =====  
NUC1 1H  
P1 12.70 usec  
PL1 -1.00 dB  
SFO1 500.1327500 MHz

F2 - Processing parameters  
SI 65536  
SF 500.1300235 MHz  
WDW no  
SSB 0  
LB 0.00 Hz  
GB 0  
PC 1.00

125.7 MHz <sup>13</sup>C NMR spectrum in CDCl<sub>3</sub>

Current Data Parameters  
 NAME Kap04-144-04  
 EXPNO 3  
 PROCNO 1

F2 - Acquisition Parameters  
 Date\_ 20100527  
 Time 17.32

INSTRUM spect  
 PROBD 5 mm Dual 13C/  
 PULPROG zgpg30  
 TD 65536  
 SOLVENT CDCl3

NS 4  
 DS 4  
 SWH 31446.541 Hz  
 FDRRES 0.47836 Hz

AQ 1.0420883 sec  
 RG 20642.5  
 DW 15.900 usec  
 DE 20.00 usec  
 TE 298.0 K

D1 2.00000000 sec  
 d11 0.03000000 sec  
 DELTA 1.89999998 sec  
 MCREST 0.00000000 sec  
 MCWRR 0.01500000 sec

==== CHANNEL f1 =====  
 NUC1 13C  
 P1 14.00 usec  
 PL1 2.00 dB  
 SFO1 125.7709890 MHz

==== CHANNEL f2 =====  
 CPDPRG2 waltz16  
 NUC2 1H  
 PCPD2 100.00 usec  
 PL2 120.00 dB  
 PL12 16.00 dB  
 PL13 20.00 dB  
 SFO2 500.1322500 MHz

F2 - Processing parameters  
 SI 65536  
 SF 125.7577736 MHz  
 WDW no  
 SSB 0  
 LB 0.00 Hz  
 GB 0  
 PC 1.00

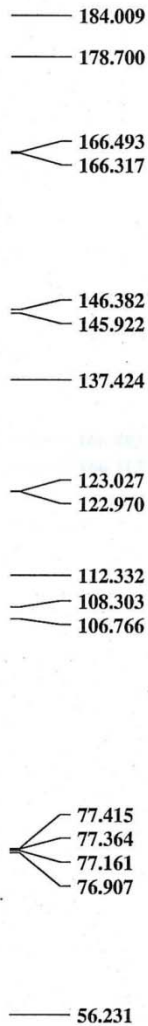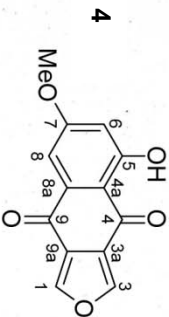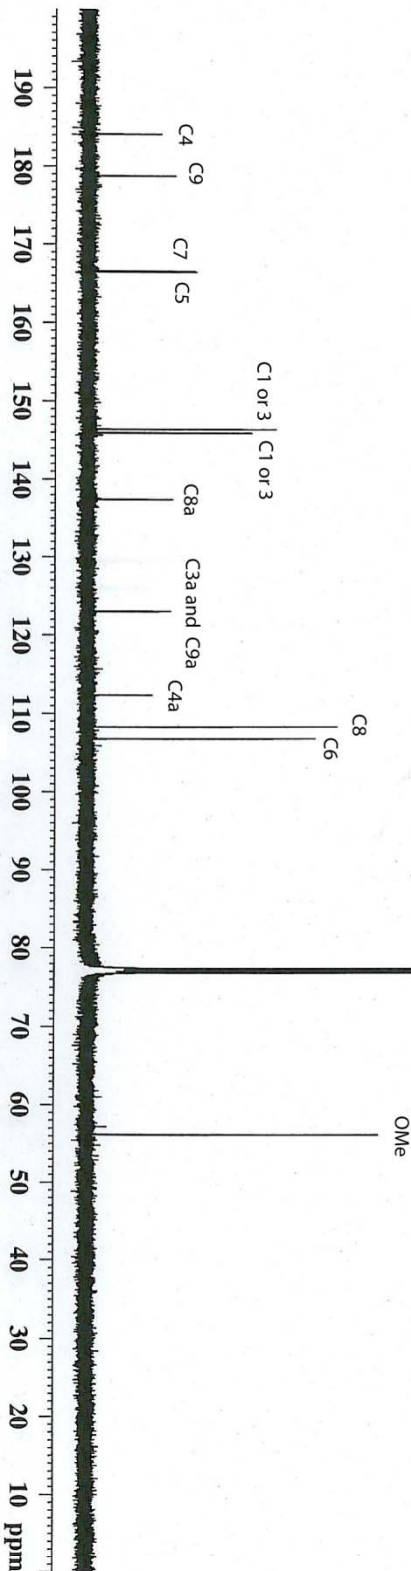

500 MHz <sup>1</sup>H NMR spectrum in CDCl<sub>3</sub>

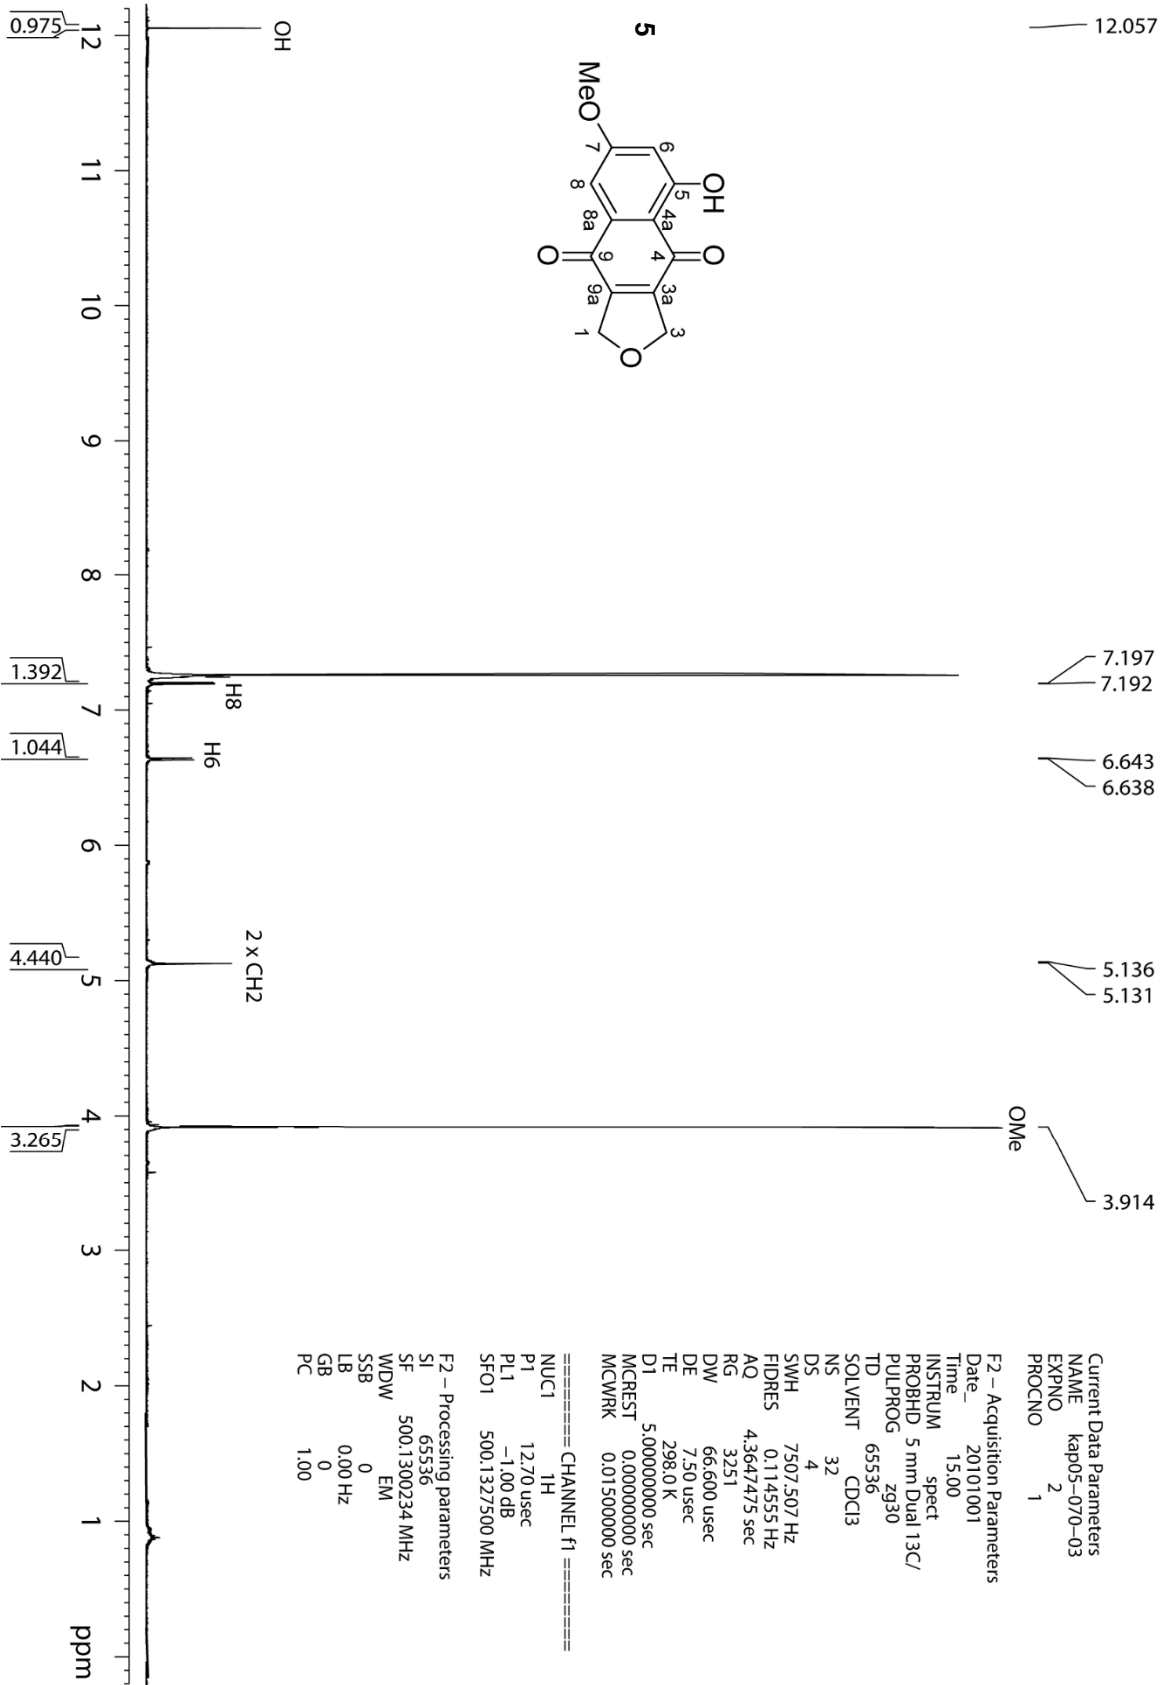

Supplement: c4ob00331d1.pdf [file c4ob00331d1.pdf]
